# Supplementary material
Source: publisher figshare collection journal article supplement (https://asha.figshare.com/articles/dataset/_/28508936)
Supplement: Supplementary file 1 [file 1]

## Supplemental Material S2. Part B: CINAHL Ultimate (EBSCO) search strategy.

1. SO ("American Journal of Audiology" OR "American Journal of Speech-Language Pathology" OR "Journal of Speech, Language, and Hearing Research" OR "Journal of Speech, Language, & Hearing Research" OR "Language, Speech, and Hearing Services in Schools" OR "Language, Speech, & Hearing Services in Schools" OR "PERSPECTIVES OF THE ASHA SPECIAL INTEREST GROUPS" OR "Contemporary Issues in Communication Science and Disorders" OR "Contemporary Issues in Communication Science & Disorders")
2. IS ("1059-0889" OR "1058-0360" OR "1092-4388" OR "0161-1461" OR "1092-5171" OR "1558-9137" OR "1558-9110" OR "1558-9102" OR "1558-9129" OR "2381-473X")
3. TI ("Communication problems" OR "Communication needs" OR "Language problems" OR "Language difficulties" OR "Communication difficulties" OR "Language needs" OR "Specific language impairment" OR "Communication delay" OR "Language impairment" OR "Language disorder" OR "Language delay" OR "Communication disorder" OR "Communication impairment" OR "Language disability" OR "Developmental language disorder" OR "Speech and language difficulties" OR "Speech and language disorder" OR "Speech and language problems" OR "Communication disability" OR "Developmental aphasia" OR "Speech and language impairment" OR "Developmental dysphasia" OR "Language learning needs" OR "Speech/language needs" OR "Speech/language impairment" OR "Language learning difficulties" OR "Language learning problems" OR "Developmental language delay" OR "Developmental language impairment" OR "Language learning disability" OR "Speech/language disorder" OR "Speech, language and communication needs" OR "Speech/language problems" OR "Congenital aphasia" OR "Congenital word deafness" OR "Delayed speech development" OR "Congenital auditory imperceptions" OR "Congenital verbal auditory agnosia" OR "Developmental aphasia" OR "Deviant language" OR "Delayed language" OR "Specific language deficit") OR AB ("Communication problems" OR "Communication needs" OR "Language problems" OR "Language difficulties" OR "Communication difficulties" OR "Language needs" OR "Specific language impairment" OR "Communication delay" OR "Language impairment" OR "Language disorder" OR "Language delay" OR "Communication disorder" OR "Communication impairment" OR "Language disability" OR "Developmental language disorder" OR "Speech and language difficulties" OR "Speech and language disorder" OR "Speech and language problems" OR "Communication disability" OR "Developmental aphasia" OR "Speech and language impairment" OR "Developmental dysphasia" OR "Language learning needs" OR "Speech/language needs" OR "Speech/language impairment" OR "Language learning difficulties" OR "Language learning problems" OR "Developmental language delay" OR "Developmental language impairment" OR "Language learning disability" OR "Speech/language disorder" OR "Speech, language and communication needs" OR "Speech/language problems" OR "Congenital aphasia" OR "Congenital word deafness" OR "Delayed speech development" OR "Congenital auditory imperceptions" OR "Congenital verbal auditory agnosia" OR "Developmental aphasia" OR "Deviant language" OR "Delayed language" OR "Specific language deficit")
4. (S1 OR S2) AND S3

Searches conducted on October 4, 2022 and then updated on March 15, 2024.
