# Supplementary material
Source: publisher figshare collection journal article supplement (https://asha.figshare.com/articles/dataset/_/28508936)
Supplement: Supplementary file 3 [file 1]

### Supplemental Material S3. Part C: Reference list of included publications.

- Adams, C., Lockton, E., & Collins, A. (2018). Metapragmatic Explicitation and Social Attribution in Social Communication Disorder and Developmental Language Disorder: A Comparative Study. *Journal of Speech, Language & Hearing Research*, 61(3), 604–618. [https://doi.org/10.1044/2017\\_JSLHR-L-17-0026](https://doi.org/10.1044/2017_JSLHR-L-17-0026)
- Adlof, S. M., Baron, L. S., Bell, B. A., & Scoggins, J. (2021). Spoken Word Learning in Children With Developmental Language Disorder or Dyslexia. *Journal of Speech, Language & Hearing Research*, 64(7), 2734–2749. [https://doi.org/10.1044/2021\\_JSLHR-20-00217](https://doi.org/10.1044/2021_JSLHR-20-00217)
- Adlof, S. M., Scoggins, J., Brazendale, A., Babb, S., & Petscher, Y. (2017). Identifying Children at Risk for Language Impairment or Dyslexia With Group-Administered Measures. *Journal of Speech, Language & Hearing Research*, 60(12), 3507–3522. [https://doi.org/10.1044/2017\\_JSLHR-L-16-0473](https://doi.org/10.1044/2017_JSLHR-L-16-0473)
- Aguilar, J. M., Plante, E., & Sandoval, M. (2018). Exemplar Variability Facilitates Retention of Word Learning by Children With Specific Language Impairment. *Language, Speech & Hearing Services in Schools*, 49(1), 72–84. [https://doi.org/10.1044/2017\\_LSHSS-17-0031](https://doi.org/10.1044/2017_LSHSS-17-0031)
- Ahmed, A. U. (2021). Auditory Processing Disorder and Its Comorbidities: A Need for Consistency in Test Cutoff Scores. *American Journal of Audiology*, 30(1), 128–144. [https://doi.org/10.1044/2020\\_AJA-20-00103](https://doi.org/10.1044/2020_AJA-20-00103)
- Albudoor, N., & Peña, E. D. (2022). Identifying Language Disorder in Bilingual Children Using Automatic Speech Recognition. *Journal of Speech, Language & Hearing Research*, 65(7), 2648–2661. [https://doi.org/10.1044/2022\\_JSLHR-21-00667](https://doi.org/10.1044/2022_JSLHR-21-00667)
- Aljahlan, Y., & Spaulding, T. J. (2019). The Impact of Manipulating Attentional Shifting Demands on Preschool Children With Specific Language Impairment. *Journal of Speech, Language & Hearing Research*, 62(2), 324–336. [https://doi.org/10.1044/2018\\_JSLHR-L-17-0358](https://doi.org/10.1044/2018_JSLHR-L-17-0358)
- Aljahlan, Y., & Spaulding, T. J. (2023). Does Movement Contextually Cue Attention During Novel Word Exposure? A Comparison of Preschool Children With Developmental Language Disorder and With Typical Language. *Journal of Speech, Language & Hearing Research*, 66(11), 4519–4531. [https://doi.org/10.1044/2023\\_JSLHR-23-00316](https://doi.org/10.1044/2023_JSLHR-23-00316)
- Alonzo, C. N., McIlraith, A. L., Catts, H. W., & Hogan, T. P. (2020). Predicting Dyslexia in Children With Developmental Language Disorder. *Journal of Speech, Language & Hearing Research*, 63(1), 151–162. [https://doi.org/10.1044/2019\\_JSLHR-L-18-0265](https://doi.org/10.1044/2019_JSLHR-L-18-0265)
- Alt, M., Gray, S., Hogan, T. P., Schlesinger, N., & Cowan, N. (2019). Spoken Word Learning Differences Among Children With Dyslexia, Concomitant Dyslexia and Developmental Language Disorder, and Typical Development. *Language, Speech & Hearing Services in Schools*, 50(4), 540–561. [https://doi.org/10.1044/2019\\_LSHSS-VOIA-18-0138](https://doi.org/10.1044/2019_LSHSS-VOIA-18-0138)
- Anaya, J. B., Peña, E. D., & Bedore, L. M. (2018). Conceptual Scoring and Classification Accuracy of Vocabulary Testing in Bilingual Children. *Language, Speech & Hearing Services in Schools*, 49(1), 85–97. [https://doi.org/10.1044/2017\\_LSHSS-16-0081](https://doi.org/10.1044/2017_LSHSS-16-0081)

- Andres, E. M., Kelsey Earnest, K., Smith, S. D., Rice, M. L., & Hashim Raza, M. (2020). Pedigree-Based Gene Mapping Supports Previous Loci and Reveals Novel Suggestive Loci in Specific Language Impairment. *Journal of Speech, Language & Hearing Research*, 63(12), 4046–4061. [https://doi.org/10.1044/2020\\_JSLHR-20-00102](https://doi.org/10.1044/2020_JSLHR-20-00102)
- Andrés-Roqueta, C., & Katsos, N. (2020). A Distinction Between Linguistic and Social Pragmatics Helps the Precise Characterization of Pragmatic Challenges in Children With Autism Spectrum Disorders and Developmental Language Disorder. *Journal of Speech, Language & Hearing Research*, 63(5), 1494–1508. [https://doi.org/10.1044/2020\\_JSLHR-19-00263](https://doi.org/10.1044/2020_JSLHR-19-00263)
- Arbel, Y., Fitzpatrick, I., & Xinyi He. (2021). Learning With and Without Feedback in Children With Developmental Language Disorder. *Journal of Speech, Language & Hearing Research*, 64(5), 1696–1711. [https://doi.org/10.1044/2021\\_JSLHR-20-00499](https://doi.org/10.1044/2021_JSLHR-20-00499)
- Armstrong, R., Symons, M., Scott, J. G., Arnott, W. L., Copland, D. A., McMahon, K. L., & Whitehouse, A. J. O. (2018). Predicting Language Difficulties in Middle Childhood From Early Developmental Milestones: A Comparison of Traditional Regression and Machine Learning Techniques. *Journal of Speech, Language & Hearing Research*, 61(8), 1926–1944. [https://doi.org/10.1044/2018\\_JSLHR-L-17-0210](https://doi.org/10.1044/2018_JSLHR-L-17-0210)
- Bahn, D., Vesker, M., Schwarzer, G., & Kauschke, C. (2021). A Multimodal Comparison of Emotion Categorization Abilities in Children With Developmental Language Disorder. *Journal of Speech, Language & Hearing Research*, 64(3), 993–1007. [https://doi.org/10.1044/2020\\_JSLHR-20-00413](https://doi.org/10.1044/2020_JSLHR-20-00413)
- Balthazar, C. H., & Scott, C. M. (2018). Targeting Complex Sentences in Older School Children With Specific Language Impairment: Results From an Early-Phase Treatment Study. *Journal of Speech, Language & Hearing Research*, 61(3), 713–728. [https://doi.org/10.1044/2017\\_JSLHR-L-17-0105](https://doi.org/10.1044/2017_JSLHR-L-17-0105)
- Barragan, B., Castilla-Earls, A., Martinez-Nieto, L., Restrepo, M. A., & Gray, S. (2018). Performance of Low-Income Dual Language Learners Attending English-Only Schools on the Clinical Evaluation of Language Fundamentals-Fourth Edition, Spanish. *Language, Speech & Hearing Services in Schools*, 49(2), 292–305. [https://doi.org/10.1044/2017\\_LSHSS-17-0013](https://doi.org/10.1044/2017_LSHSS-17-0013)
- Bedore, L. M., Peña, E. D., Anaya, J. B., Nieto, R., Lugo-Neris, M. J., & Baron, A. (2018). Understanding Disorder Within Variation: Production of English Grammatical Forms by English Language Learners. *Language, Speech & Hearing Services in Schools*, 49(2), 277–291. [https://doi.org/10.1044/2017\\_LSHSS-17-0027](https://doi.org/10.1044/2017_LSHSS-17-0027)
- Benavides, A. A., Kapantzoglou, M., & Murata, C. (2018). Two Grammatical Tasks for Screening Language Abilities in Spanish-Speaking Children. *American Journal of Speech-Language Pathology*, 27(2), 690–705. [https://doi.org/10.1044/2017\\_AJSLP-17-0052](https://doi.org/10.1044/2017_AJSLP-17-0052)
- Benham, S., & Goffman, L. (2020). Lexical—Semantic Cues Induce Sound Pattern Stability in Children With Developmental Language Disorder. *Journal of Speech, Language & Hearing Research*, 63(12), 4109–4126. [https://doi.org/10.1044/2020\\_JSLHR-20-00244](https://doi.org/10.1044/2020_JSLHR-20-00244)

- Benham, S., Goffman, L., & Schweickert, R. (2018). An Application of Network Science to Phonological Sequence Learning in Children With Developmental Language Disorder. *Journal of Speech, Language & Hearing Research*, 61(9), 2275–2291. [https://doi.org/10.1044/2018\\_JSLHR-L-18-0036](https://doi.org/10.1044/2018_JSLHR-L-18-0036)
- Benham, S., Wisler, A., Berlin, J., Wang, J., & Goffman, L. (2023). Acoustic and Kinematic Methods of Indexing Spatiotemporal Stability in Children With Developmental Language Disorder. *Journal of Speech, Language & Hearing Research*, 66, 3026–3037. [https://doi.org/10.1044/2022\\_JSLHR-22-00290](https://doi.org/10.1044/2022_JSLHR-22-00290)
- Blom, E., & Boerma, T. (2020). Do Children With Developmental Language Disorder (DLD) Have Difficulties With Interference Control, Visuospatial Working Memory, and Selective Attention? Developmental Patterns and the Role of Severity and Persistence of DLD. *Journal of Speech, Language & Hearing Research*, 63(9), 3036–3050. [https://doi.org/10.1044/2020\\_JSLHR-20-00012](https://doi.org/10.1044/2020_JSLHR-20-00012)
- Blom, E., Fikkert, P., Scheper, A., van Witteloostuijn, M., & van Alphen, P. (2023). The Language Environment at Home of Children With (a Suspicion of) a Developmental Language Disorder and Relations With Standardized Language Measures. *Journal of Speech, Language & Hearing Research*, 66(8), 2821–2830. [https://doi.org/10.1044/2023\\_JSLHR-23-00066](https://doi.org/10.1044/2023_JSLHR-23-00066)
- Boerma, T., Wijnen, F., Leseman, P., & Blom, E. (2017). Grammatical Morphology in Monolingual and Bilingual Children With and Without Language Impairment: The Case of Dutch Plurals and Past Participles. *Journal of Speech, Language & Hearing Research*, 60(7), 2064–2080. [https://doi.org/10.1044/2017\\_JSLHR-L-16-0351](https://doi.org/10.1044/2017_JSLHR-L-16-0351)
- Bonifacci, P., Atti, E., Casamenti, M., Piani, B., Porrelli, M., & Mari, R. (2020). Which Measures Better Discriminate Language Minority Bilingual Children With and Without Developmental Language Disorder? A Study Testing a Combined Protocol of First and Second Language Assessment. *Journal of Speech, Language & Hearing Research*, 63(6), 1898–1915. [https://doi.org/10.1044/2020\\_JSLHR-19-00100](https://doi.org/10.1044/2020_JSLHR-19-00100)
- Brosseau-Lapr  , F., Schumaker, J., & Kluender, K. R. (2020). Perception of Medial Consonants by Children With and Without Speech and Language Disorders: A Preliminary Study. *American Journal of Speech-Language Pathology*, 29(2), 883–889. [https://doi.org/10.1044/2020\\_AJSLP-19-00062](https://doi.org/10.1044/2020_AJSLP-19-00062)
- Bruinsma, G. I., Wijnen, F., & Gerrits, E. (2024). Communication in Daily Life of Children With Developmental Language Disorder: Parents' and Teachers' Perspectives. *Language, Speech & Hearing Services in Schools*, 55(1), 105–129. [https://doi.org/10.1044/2023\\_LSHSS-23-00051](https://doi.org/10.1044/2023_LSHSS-23-00051)
- Bruinsma, G., Wijnen, F., & Gerrits, E. (2020). Focused Stimulation Intervention in 4- and 5-Year-Old Children With Developmental Language Disorder: Exploring Implementation in Clinical Practice. *Language, Speech & Hearing Services in Schools*, 51(2), 247–269. [https://doi.org/10.1044/2020\\_LSHSS-19-00069](https://doi.org/10.1044/2020_LSHSS-19-00069)
- Calder, S. D., Claessen, M., Ebbels, S., & Leit  o, S. (2021). The Efficacy of an Explicit Intervention Approach to Improve Past Tense Marking for Early School-Age Children With Developmental Language Disorder. *Journal of Speech, Language & Hearing Research*, 64(1), 91–104. [https://doi.org/10.1044/2020\\_JSLHR-20-00132](https://doi.org/10.1044/2020_JSLHR-20-00132)

- Calder, S. D., Claessen, M., Ebbels, S., & Leitão, S. (2020). Explicit Grammar Intervention in Young School-Aged Children With Developmental Language Disorder: An Efficacy Study Using Single-Case Experimental Design. *Language, Speech & Hearing Services in Schools*, 51(2), 298–316. [https://doi.org/10.1044/2019\\_Lshss-19-00060](https://doi.org/10.1044/2019_Lshss-19-00060)
- Camarata, S., Stiles, S., & Birer, S. (2024). Naturalistic Developmental Behavioral Interventions for Developmental Language Disorder. *American Journal of Speech-Language Pathology*, 33(2), 627–641. [https://doi.org/10.1044/2023\\_AJSLP-23-00116](https://doi.org/10.1044/2023_AJSLP-23-00116)
- Castilla-Earls, A., Ronderos, J., & Fitton, L. (2023). Spanish Bilingual Morphosyntactic Development in Bilingual Children With and Without Developmental Language Disorder: Articles, Clitics, Verbs, and the Subjunctive Mood. *Journal of Speech, Language & Hearing Research*, 66(12), 4678–4698. [https://doi.org/10.1044/2023\\_JSLHR-23-00091](https://doi.org/10.1044/2023_JSLHR-23-00091)
- Castilla-Earls, A., Ronderos, J., & Francis, D. J. (2023). Longitudinal Examination of Morphosyntactic Skills in Bilingual Children: Spanish and English Standardized Scores. *Journal of Speech, Language & Hearing Research*, 66(8), 2671–2687. [https://doi.org/10.1044/2023\\_JSLHR-22-00495](https://doi.org/10.1044/2023_JSLHR-22-00495)
- Castilla-Earls, A., & Van Horne, A. O. (2023). Recast Therapy for Treating Syntax in Bilingual Children With Developmental Language Disorder: A Feasibility and Early Efficacy Study Examining the Role of Language of Intervention on Outcomes. *Journal of Speech, Language & Hearing Research*, 66(8), 2783–2801. [https://doi.org/10.1044/2023\\_JSLHR-22-00452](https://doi.org/10.1044/2023_JSLHR-22-00452)
- Charest, M., & Skoczylas, M. J. (2019). Lexical Diversity Versus Lexical Error in the Language Transcripts of Children With Developmental Language Disorder: Different Conclusions About Lexical Ability. *American Journal of Speech-Language Pathology*, 28(3), 1275–1282. [https://doi.org/10.1044/2019\\_AJSLP-18-0143](https://doi.org/10.1044/2019_AJSLP-18-0143)
- Charest, M., Skoczylas, M. J., & Schneider, P. (2020). Properties of Lexical Diversity in the Narratives of Children With Typical Language Development and Developmental Language Disorder. *American Journal of Speech-Language Pathology*, 29(4), 1866–1882. [https://doi.org/10.1044/2020\\_AJSLP-19-00176](https://doi.org/10.1044/2020_AJSLP-19-00176)
- Chenausky, K. V., Gagné, D., Stipancic, K. L., Shield, A., & Green, J. R. (2022). The Relationship Between Single-Word Speech Severity and Intelligibility in Childhood Apraxia of Speech. *Journal of Speech, Language & Hearing Research*, 65(3), 843–857. [https://doi.org/10.1044/2021\\_JSLHR-21-00213](https://doi.org/10.1044/2021_JSLHR-21-00213)
- Christopoulos, T. T., & Kean, J. (2020). General Education Teachers' Contribution to the Identification of Children With Language Disorders. *Perspectives of the ASHA Special Interest Groups*, 5(4), 770–781. [https://doi.org/10.1044/2020\\_PERSP-19-00166](https://doi.org/10.1044/2020_PERSP-19-00166)
- Christopoulos, T. T., & Redmond, S. M. (2023). Positive Predictive Values Associated With Adapting the Redmond Sentence Recall Measure Into a Kindergarten Screener for Developmental Language Disorder. *Language, Speech & Hearing Services in Schools*, 54(2), 636–647. [https://doi.org/10.1044/2022\\_LSHSS-22-00048](https://doi.org/10.1044/2022_LSHSS-22-00048)

- Christou, S., Julia Coloma, C., Andreu, L., Guerra, E., Araya, C., Rodriguez-Ferreiro, J., & Sanz-Torrent, M. (2022). Online Comprehension of Verbal Number Morphology in Children With Developmental Language Disorder: An Eye-Tracking Study. *Journal of Speech, Language & Hearing Research*, 65(11), 4181–4204. [https://doi.org/10.1044/2022\\_JSLHR-21-00591](https://doi.org/10.1044/2022_JSLHR-21-00591)
- Combiths, P. N., Barlow, J. A., Taps Richard, J., & Pruitt-Lord, S. L. (2019). Treatment Targets for Co-Occurring Speech-Language Impairment: A Case Study. *Perspectives of the ASHA Special Interest Groups*, 4(2), 240–256. [https://doi.org/10.1044/2019\\_PERS-SIG1-2018-0013](https://doi.org/10.1044/2019_PERS-SIG1-2018-0013)
- Coughler, C., Hamel, E. M., Cardy, J. O., Archibald, L. M. D., & Purcell, D. W. (2021). Compensation to Altered Auditory Feedback in Children With Developmental Language Disorder and Typical Development...2020 Virtual Conference on Motor Speech-Basic Science and Clinical Innovation. *Journal of Speech, Language & Hearing Research*, 64, 2363–2376. [https://doi.org/10.1044/2020\\_JSLHR-20-00374](https://doi.org/10.1044/2020_JSLHR-20-00374)
- Courteau, É., Loignon, G., Steinhauer, K., & Royle, P. (2023). Identifying Linguistic Markers of French-Speaking Teenagers With Developmental Language Disorder: Which Tasks Matter? *Journal of Speech, Language & Hearing Research*, 66(1), 221–238. [https://doi.org/10.1044/2022\\_JSLHR-21-00541](https://doi.org/10.1044/2022_JSLHR-21-00541)
- Cunningham, B. J., & Cardy, J. O. (2021). Reliability of Speech-Language Pathologists' Categorizations of Preschoolers' Communication Impairments in Practice. *American Journal of Speech-Language Pathology*, 30, 734–739. [https://doi.org/10.1044/2020\\_AJSLP-20-00239](https://doi.org/10.1044/2020_AJSLP-20-00239)
- Curran, M., & Van Horne, A. O. (2019). Use of Recast Intervention to Teach Causal Adverbials to Young Children With Developmental Language Disorder Within a Science Curriculum: A Single Case Design Study. *American Journal of Speech-Language Pathology*, 28(2), 430–447. [https://doi.org/10.1044/2018\\_AJSLP-17-0164](https://doi.org/10.1044/2018_AJSLP-17-0164)
- Danahy Eberta, K. & Giang T. Pham. (2023). What Predicts Individual Response to Language Treatment in Bilingual Children With Developmental Language Disorder? *Perspectives of the ASHA Special Interest Groups*, 8(2), 226–233. [https://doi.org/10.1044/2022\\_PERSP-22-00170](https://doi.org/10.1044/2022_PERSP-22-00170)
- Danyang Wang, Curran, M., McGregor, K., & Owen Van Horne, A. (2024). Preparing Student Clinicians to Provide Recast Therapy on Complement Clauses: A Training Program. *American Journal of Speech-Language Pathology*, 33(2), 642–653. [https://doi.org/10.1044/2023\\_AJSLP-23-00244](https://doi.org/10.1044/2023_AJSLP-23-00244)
- Danyang Wang, Li Zheng, Yuanyuan Lin, Yiwen Zhang, & Li Sheng. (2022). Sentence Repetition as a Clinical Marker for Mandarin-Speaking Preschoolers With Developmental Language Disorder. *Journal of Speech, Language & Hearing Research*, 65(4), 1543–1560. [https://doi.org/10.1044/2021\\_JSLHR-21-00401](https://doi.org/10.1044/2021_JSLHR-21-00401)
- David, C., Tuller, L., Schweitzer, E., Lescanne, E., Bonnet-Brilhault, F., Gomot, M., & Ferré, S. (2021). Does Phonological Complexity Provide a Good Index of Language Disorder in Children With Cochlear Implants? *Journal of Speech, Language & Hearing Research*, 64(11), 4271–4286. [https://doi.org/10.1044/2021\\_JSLHR-20-00642](https://doi.org/10.1044/2021_JSLHR-20-00642)

- Davidson, M. M., Alonzo, C. N., & Stransky, M. L. (2022). Access to Speech and Language Services and Service Providers for Children With Speech and Language Disorders. *American Journal of Speech-Language Pathology*, 31(4), 1702–1718. [https://doi.org/10.1044/2022\\_AJSLP-21-00287](https://doi.org/10.1044/2022_AJSLP-21-00287)
- Deevy, P., & Leonard, L. B. (2018). Sensitivity to Morphosyntactic Information in Preschool Children With and Without Developmental Language Disorder: A Follow-Up Study. *Journal of Speech, Language & Hearing Research*, 61(12), 3064–3074. [https://doi.org/10.1044/2018\\_JSLHR-L-18-0038](https://doi.org/10.1044/2018_JSLHR-L-18-0038)
- Desmottes, L., Meulemans, T., Patinec, M.-A., & Maillart, C. (2017). Distributed Training Enhances Implicit Sequence Acquisition in Children With Specific Language Impairment. *Journal of Speech, Language & Hearing Research*, 60(9), 2636–2647. [https://doi.org/10.1044/2017\\_JSLHR-L-16-0146](https://doi.org/10.1044/2017_JSLHR-L-16-0146)
- Dickinson, K. V., Ortiz-Ramírez, P. A., Arrieta-Zamudio, A., Grinstead, J., & Flores-Ávalos, B. (2023). Overt Subject Pronoun Use in Switch-Reference Contexts in Child Spanish Developmental Language Disorder: A Discriminant Function Analysis. *Journal of Speech, Language & Hearing Research*, 66(2), 605–619. [https://doi.org/10.1044/2022\\_JSLHR-21-00483](https://doi.org/10.1044/2022_JSLHR-21-00483)
- Durant, K., Peña, E., Peña, A., Bedore, L. M., & Muñoz, M. R. (2019). Not All Nonverbal Tasks Are Equally Nonverbal: Comparing Two Tasks in Bilingual Kindergartners With and Without Developmental Language Disorder. *Journal of Speech, Language & Hearing Research*, 62(9), 3462–3469. [https://doi.org/10.1044/2019\\_JSLHR-L-18-0331](https://doi.org/10.1044/2019_JSLHR-L-18-0331)
- Durkin, K., Toseeb, U., Botting, N., Pickles, A., & Conti-Ramsden, G. (2017). Social Confidence in Early Adulthood Among Young People With and Without a History of Language Impairment. *Journal of Speech, Language & Hearing Research*, 60(6), 1635–1647. [https://doi.org/10.1044/2017\\_JSLHR-L-16-0256](https://doi.org/10.1044/2017_JSLHR-L-16-0256)
- Durrleman, S., & Delage, H. (2020). Training Complements for Belief Reasoning in Developmental Language Disorder. *Journal of Speech, Language & Hearing Research*, 63(6), 1861–1877. [https://doi.org/10.1044/2020\\_JSLHR-19-00075](https://doi.org/10.1044/2020_JSLHR-19-00075)
- Dynia, J. M., & Solari, E. J. (2021). Print Knowledge in Children With Autism Spectrum Disorder: Do Child and Family Variables Play a Role? *Language, Speech & Hearing Services in Schools*, 52(1), 197–208. [https://doi.org/10.1044/2020\\_LSHSS-20-00025](https://doi.org/10.1044/2020_LSHSS-20-00025)
- Earle, F. S., & Ullman, M. T. (2021). Deficits of Learning in Procedural Memory and Consolidation in Declarative Memory in Adults With Developmental Language Disorder. *Journal of Speech, Language & Hearing Research*, 64(2), 531–541. [https://doi.org/10.1044/2020\\_JSLHR-20-00292](https://doi.org/10.1044/2020_JSLHR-20-00292)
- Ebert, K. D. (2021). Revisiting the Influences of Bilingualism and Developmental Language Disorder on Children's Nonverbal Processing Speed. *Journal of Speech, Language & Hearing Research*, 64(9), 3564–3570. [https://doi.org/10.1044/2021\\_JSLHR-21-00156](https://doi.org/10.1044/2021_JSLHR-21-00156)
- Ebert, K. D., & Pham, G. (2017). Synthesizing Information From Language Samples and Standardized Tests in School-Age Bilingual Assessment. *Language, Speech & Hearing Services in Schools*, 48(1), 42–55. [https://doi.org/10.1044/2016\\_LSHSS-16-0007](https://doi.org/10.1044/2016_LSHSS-16-0007)

- Ebert, K. D., & Pham, G. (2019). Including Nonlinguistic Processing Tasks in the Identification of Developmental Language Disorder. *American Journal of Speech-Language Pathology*, 28(3), 932–944. [https://doi.org/10.1044/2019\\_AJSLP-IDLL-18-0208](https://doi.org/10.1044/2019_AJSLP-IDLL-18-0208)
- Ebert, K. D., Rak, D., Slawny, C. M., & Fogg, L. (2019). Attention in Bilingual Children With Developmental Language Disorder. *Journal of Speech, Language & Hearing Research*, 62(4), 979–992. [https://doi.org/10.1044/2018\\_JSLHR-L-18-0221](https://doi.org/10.1044/2018_JSLHR-L-18-0221)
- Eidsvåg, S. S., Plante, E., Oglivie, T., Privette, C., & Mailend, M.-L. (2019). Individual Versus Small Group Treatment of Morphological Errors for Children With Developmental Language Disorder. *Language, Speech & Hearing Services in Schools*, 50(2), 237–252. [https://doi.org/10.1044/2018\\_LSHSS-18-0033](https://doi.org/10.1044/2018_LSHSS-18-0033)
- Evans, J. L., Gillam, R. B., & Montgomery, J. W. (2018). Cognitive Predictors of Spoken Word Recognition in Children With and Without Developmental Language Disorders. *Journal of Speech, Language & Hearing Research*, 61(6), 1409–1425. [https://doi.org/10.1044/2018\\_JSLHR-L-17-0150](https://doi.org/10.1044/2018_JSLHR-L-17-0150)
- Everaert, E., Boerma, T., Selten, I., Gerrits, E., Houben, M., Vorstman, J., & Wijnena, F. (2023). Nonverbal Executive Functioning in Relation to Vocabulary and Morphosyntax in Preschool Children With and Without Developmental Language Disorder. *Journal of Speech, Language & Hearing Research*, 66(10), 3954–3973. [https://doi.org/10.1044/2023\\_JSLHR-22-00732](https://doi.org/10.1044/2023_JSLHR-22-00732)
- Ferman, S., Kishon-Rabin, L., Ganot-Budaga, H., & Karni, A. (2019). Deficits in Explicit Language Problem Solving Rather Than in Implicit Learning in Specific Language Impairment: Evidence From Learning an Artificial Morphological Rule. *Journal of Speech, Language & Hearing Research*, 62(10), 3790–3807. [https://doi.org/10.1044/2019\\_JSLHR-L-17-0140](https://doi.org/10.1044/2019_JSLHR-L-17-0140)
- Fey, M. E., Leonard, L. B., Bredin-Oj, S. L., & Deevy, P. (2017). A Clinical Evaluation of the Competing Sources of Input Hypothesis. *Journal of Speech, Language & Hearing Research*, 60(1), 104–120. [https://doi.org/10.1044/2016\\_JSLHR-L-15-0448](https://doi.org/10.1044/2016_JSLHR-L-15-0448)
- Fichman, S., & Altman, C. (2019). Referential Cohesion in the Narratives of Bilingual and Monolingual Children With Typically Developing Language and With Specific Language Impairment. *Journal of Speech, Language & Hearing Research*, 62(1), 123–142. [https://doi.org/10.1044/2018\\_JSLHR-L-18-0054](https://doi.org/10.1044/2018_JSLHR-L-18-0054)
- Finestack, L. H. (2018). Evaluation of an Explicit Intervention to Teach Novel Grammatical Forms to Children With Developmental Language Disorder. *Journal of Speech, Language & Hearing Research*, 61(8), 2062–2075. [https://doi.org/10.1044/2018\\_JSLHR-L-17-0339](https://doi.org/10.1044/2018_JSLHR-L-17-0339)
- Finestack, L. H., Rohwer, B., Hilliard, L., & Abbeduto, L. (2020). Using Computerized Language Analysis to Evaluate Grammatical Skills. *Language, Speech & Hearing Services in Schools*, 51(2), 184–204. [https://doi.org/10.1044/2019\\_LSHSS-19-00032](https://doi.org/10.1044/2019_LSHSS-19-00032)
- Fox, C. B., Israelsen-Augenstein, M., Jones, S., & Gillam, S. L. (2021). An Evaluation of Expedited Transcription Methods for School-Age Children's Narrative Language: Automatic Speech Recognition and Real-Time Transcription. *Journal of Speech, Language & Hearing Research*, 64(9), 3533–3548. [https://doi.org/10.1044/2021\\_JSLHR-21-00096](https://doi.org/10.1044/2021_JSLHR-21-00096)

- Gallagher, J. F., & Hoover, J. R. (2020). Measure What You Treat: Using Language Sample Analysis for Grammatical Outcome Measures in Children With Developmental Language Disorder. *Perspectives of the ASHA Special Interest Groups*, 5(2), 350–363. [https://doi.org/10.1044/2019\\_PERSP-19-00100](https://doi.org/10.1044/2019_PERSP-19-00100)
- Gatlin-Nash, B., Peña, E. D., Bedore, L. M., Simon-Cereijido, G., & Iglesias, A. (2021). English BESA Morphosyntax Performance Among Spanish—English Bilinguals Who Use African American English. *Journal of Speech, Language & Hearing Research*, 64(10), 3826–3842. [https://doi.org/10.1044/2021\\_JSLHR-20-00737](https://doi.org/10.1044/2021_JSLHR-20-00737)
- Gerken, L., Plante, E., & Goffman, L. (2021). Not All Procedural Learning Tasks Are Difficult for Adults With Developmental Language Disorder. *Journal of Speech, Language & Hearing Research*, 64(3), 922–934. [https://doi.org/10.1044/2020\\_JSLHR-20-00548](https://doi.org/10.1044/2020_JSLHR-20-00548)
- Gerwin, K. L., Walsh, B., & Christ, S. L. (2022). Error Characteristics Lend Specificity to Nonword Repetition Performance in Children Who Stutter With and Without Concomitant Disorders. *Journal of Speech, Language & Hearing Research*, 65(7), 2571–2585. [https://doi.org/10.1044/2022\\_JSLHR-21-00654](https://doi.org/10.1044/2022_JSLHR-21-00654)
- Gerwin, K. L., Walsh, B., & Tichenor, S. E. (2022). Nonword Repetition Performance Differentiates Children Who Stutter With and Without Concomitant Speech Sound and Developmental Language Disorders. *Journal of Speech, Language & Hearing Research*, 65(1), 96–108. [https://doi.org/10.1044/2021\\_JSLHR-21-00334](https://doi.org/10.1044/2021_JSLHR-21-00334)
- Giang Pham, & Ebert, K. D. (2020). Diagnostic Accuracy of Sentence Repetition and Nonword Repetition for Developmental Language Disorder in Vietnamese. *Journal of Speech, Language & Hearing Research*, 63(5), 1521–1536. [https://doi.org/10.1044/2020\\_JSLHR-19-00366](https://doi.org/10.1044/2020_JSLHR-19-00366)
- Gibson, T. A., Peña, E. D., & Bedore, L. M. (2018). The Receptive-Expressive Gap in English Narratives of Spanish-English Bilingual Children With and Without Language Impairment. *Journal of Speech, Language & Hearing Research*, 61(6), 1381–1392. [https://doi.org/10.1044/2018\\_JSLHR-L-16-0432](https://doi.org/10.1044/2018_JSLHR-L-16-0432)
- Godin, M.-P., Berthiaume, R., & Daigle, D. (2021). The “Sound of Silence”: Sensitivity to Silent Letters in Children With and Without Developmental Language Disorder. *Language, Speech & Hearing Services in Schools*, 52(4), 1007–1019. [https://doi.org/10.1044/2021\\_LSHSS-21-00004](https://doi.org/10.1044/2021_LSHSS-21-00004)
- Goffman, L., Factor, L., Barna, M., Fuwen Cai, & Feld, I. (2023). Phonological and Articulatory Deficits in the Production of Novel Signs in Children With Developmental Language Disorder. *Journal of Speech, Language & Hearing Research*, 66(3), 1051–1067. [https://doi.org/10.1044/2022\\_JSLHR-22-00434](https://doi.org/10.1044/2022_JSLHR-22-00434)
- Gold, R., Klein, D., & Segal, O. (2022). The Bouba-Kiki Effect in Children With Childhood Apraxia of Speech. *Journal of Speech, Language & Hearing Research*, 65(1), 43–52. [https://doi.org/10.1044/2021\\_JSLHR-21-00070](https://doi.org/10.1044/2021_JSLHR-21-00070)
- Gordon, K. R., Storkel, H. L., Lowry, S. L., & Sultani, M. J. (2024). A Word-Learning Intervention Pilot Study Utilizing Principles of Retrieval- and Criterion-Based Learning for Children With Developmental Language Disorder. *American Journal of Speech-Language Pathology*, 33(2), 530–551. [https://doi.org/10.1044/2023\\_AJSLP-23-00037](https://doi.org/10.1044/2023_AJSLP-23-00037)



- Gordon, K. R., Storkel, H. L., Uglow, S., & Ohlmann, N. B. (2021). Word Learning by Preschool-Age Children With Developmental Language Disorder: Impaired Encoding and Robust Consolidation During Slow Mapping. *Journal of Speech, Language & Hearing Research*, 64(11), 4250–4270. [https://doi.org/10.1044/2021\\_JSLHR-21-00046](https://doi.org/10.1044/2021_JSLHR-21-00046)
- Gough Kenyon, S. M., Palikara, O., & Lucas, R. M. (2018). Explaining Reading Comprehension in Children With Developmental Language Disorder: The Importance of Elaborative Inferencing. *Journal of Speech, Language & Hearing Research*, 61(10), 2517–2531. [https://doi.org/10.1044/2018\\_JSLHR-L-17-0416](https://doi.org/10.1044/2018_JSLHR-L-17-0416)
- Grasso, S. M., Peña, E. D., Bedore, L. M., Hixon, J. G., & Griffin, Z. M. (2018). Cross-Linguistic Cognate Production in Spanish-English Bilingual Children With and Without Specific Language Impairment. *Journal of Speech, Language & Hearing Research*, 61(3), 619–633. [https://doi.org/10.1044/2017\\_JSLHR-L-16-0421](https://doi.org/10.1044/2017_JSLHR-L-16-0421)
- Gray, S., Fox, A. B., Green, S., Alt, M., Hogan, T. P., Petscher, Y., & Cowan, N. (2019). Working Memory Profiles of Children With Dyslexia, Developmental Language Disorder, or Both. *Journal of Speech, Language & Hearing Research*, 62(6), 1839–1858. [https://doi.org/10.1044/2019\\_JSLHR-L-18-0148](https://doi.org/10.1044/2019_JSLHR-L-18-0148)
- Green, L., & Steele, R. (2019). Improving the Derivational Morphological Skills of a Ninth Grader With Language and Reading Disabilities: A Public School Case Study. *Perspectives of the ASHA Special Interest Groups*, 4(5), 759–770. [https://doi.org/10.1044/2019\\_PERS-SIG1-2019-0004](https://doi.org/10.1044/2019_PERS-SIG1-2019-0004)
- Gregory, K. D., & Oetting, J. B. (2018). Classification Accuracy of Teacher Ratings When Screening Nonmainstream English-Speaking Kindergartners for Language Impairment in the Rural South. *Language, Speech & Hearing Services in Schools*, 49(2), 218–231. [https://doi.org/10.1044/2017\\_LSHSS-17-0045](https://doi.org/10.1044/2017_LSHSS-17-0045)
- Gross, M. C., & Castilla-Earls, A. (2023). Code-Switching During Narratives by Bilingual Children With and Without Developmental Language Disorder. *Language, Speech & Hearing Services in Schools*, 54(3), 996–1019. [https://doi.org/10.1044/2023\\_LSHSS-22-00149](https://doi.org/10.1044/2023_LSHSS-22-00149)
- Gross, M. C., & Kaushanskaya, M. (2022). Language Control and Code-Switching in Bilingual Children With Developmental Language Disorder. *Journal of Speech, Language & Hearing Research*, 65(3), 1104–1127. [https://doi.org/10.1044/2021\\_JSLHR-21-00332](https://doi.org/10.1044/2021_JSLHR-21-00332)
- Gul, A., Baron, L., & Arbel, Y. (2022). Feedback Processing During Probabilistic Learning in Children With Developmental Language Disorder: An Event-Related Potential Study. *Journal of Speech, Language & Hearing Research*, 65(6), 2272–2287. [https://doi.org/10.1044/2022\\_JSLHR-21-00612](https://doi.org/10.1044/2022_JSLHR-21-00612)
- Hadjadj, O., Kehoe, M., & Delage, H. (2024). Dynamic Assessment of Narrative Skills for Identifying Developmental Language Disorder in Monolingual and Bilingual French-Speaking Children. *Language, Speech & Hearing Services in Schools*, 55(1), 130–151. [https://doi.org/10.1044/2023\\_LSHSS-23-00054](https://doi.org/10.1044/2023_LSHSS-23-00054)
- Hadley, P. A. (2020). Exploring Sentence Diversity at the Boundary of Typical and Impaired Language Abilities. *Journal of Speech, Language & Hearing Research*, 63(10), 3235–3251. [https://doi.org/10.1044/2020\\_JSLHR-20-00031](https://doi.org/10.1044/2020_JSLHR-20-00031)

- Haebig, E., Leonard, L. B., Deevy, P., Karpicke, J., Christ, S. L., Usler, E., Kueser, J. B., Souto, S., Krok, W., & Weber, C. (2019). Retrieval-Based Word Learning in Young Typically Developing Children and Children With Development Language Disorder II: A Comparison of Retrieval Schedules. *Journal of Speech, Language & Hearing Research*, 62(4), 944–964. [https://doi.org/10.1044/2018\\_JSLHR-L-18-0071](https://doi.org/10.1044/2018_JSLHR-L-18-0071)
- Haebig, E., Leonard, L., Usler, E., Deevy, P., & Weber, C. (2018). An Initial Investigation of the Neural Correlates of Word Processing in Preschoolers With Specific Language Impairment. *Journal of Speech, Language & Hearing Research*, 61(3), 729–739. [https://doi.org/10.1044/2017\\_JSLHR-L-17-0249](https://doi.org/10.1044/2017_JSLHR-L-17-0249)
- Hall, J. E., Van Horne, A. O., McGregor, K. K., & Farmer, T. A. (2019). Deficits in the Use of Verb Bias Information in Real-Time Processing by College Students With Developmental Language Disorder. *Journal of Speech, Language & Hearing Research*, 62(2), 337–355. [https://doi.org/10.1044/2018\\_JSLHR-L-17-0267](https://doi.org/10.1044/2018_JSLHR-L-17-0267)
- Hall, J., & Plante, E. (2020). Data-Informed Guideposts for Decision Making in Enhanced Conversational Recast Treatment. *American Journal of Speech-Language Pathology*, 29(4), 2068–2081. [https://doi.org/10.1044/2020\\_AJSLP-20-00017](https://doi.org/10.1044/2020_AJSLP-20-00017)
- Hall, J., Van Horne, A. J. O., McGregor, K. K., & Farmer, T. A. (2018). Individual and Developmental Differences in Distributional Learning. *Language, Speech & Hearing Services in Schools*, 49, 694–709. [https://doi.org/10.1044/2018\\_LSHSS-STLT1-17-0134](https://doi.org/10.1044/2018_LSHSS-STLT1-17-0134)
- Hall, J., Van Horne, A. O., McGregor, K. K., & Farmer, T. (2017). Distributional Learning in College Students With Developmental Language Disorder. *Journal of Speech, Language & Hearing Research*, 60(11), 3270–3283. [https://doi.org/10.1044/2017\\_JSLHR-L-17-0013](https://doi.org/10.1044/2017_JSLHR-L-17-0013)
- Hallin, A. E., & Reuterskiöld, C. (2017). Error Type and Lexical Frequency Effects: Error Detection in Swedish Children With Language Impairment. *Journal of Speech, Language & Hearing Research*, 60(10), 2924–2934. [https://doi.org/10.1044/2017\\_JSLHR-L-16-0294](https://doi.org/10.1044/2017_JSLHR-L-16-0294)
- Haukedal, C. L., Wie, O. B., Schaubert, S. K., & von Koss Torkildsen, J. (2023). Children With Developmental Language Disorder Have Lower Quality of Life Than Children With Typical Development and Children With Cochlear Implants. *Journal of Speech, Language & Hearing Research*, 66(10), 3988–4008. [https://doi.org/10.1044/2023\\_JSLHR-22-00742](https://doi.org/10.1044/2023_JSLHR-22-00742)
- Heikkilä, J., Lonka, E., Ahola, S., Meronen, A., & Tiippana, K. (2017). Lipreading Ability and Its Cognitive Correlates in Typically Developing Children and Children With Specific Language Impairment. *Journal of Speech, Language & Hearing Research*, 60(3), 485–493. [https://doi.org/10.1044/2016\\_JSLHR-S-15-0071](https://doi.org/10.1044/2016_JSLHR-S-15-0071)
- Henderson, D. E., Restrepo, M. A., & Aiken, L. S. (2018). Dynamic Assessment of Narratives Among Navajo Preschoolers. *Journal of Speech, Language & Hearing Research*, 61(10), 2547–2560. [https://doi.org/10.1044/2018\\_JSLHR-L-17-0313](https://doi.org/10.1044/2018_JSLHR-L-17-0313)
- Hendricks, A. E., & Adlof, S. M. (2020). Production of Morphosyntax Within and Across Different Dialects of American English. *Journal of Speech, Language & Hearing Research*, 63(7), 2322–2333. [https://doi.org/10.1044/2020\\_JSLHR-19-00244](https://doi.org/10.1044/2020_JSLHR-19-00244)

- Hendricks, A. E., Adlof, S. M., Alonzo, C. N., Fox, A. B., & Hogan, T. P. (2019). Identifying Children at Risk for Developmental Language Disorder Using a Brief, Whole-Classroom Screen. *Journal of Speech, Language & Hearing Research*, 62(4), 896–908. [https://doi.org/10.1044/2018\\_JSLHR-L-18-0093](https://doi.org/10.1044/2018_JSLHR-L-18-0093)
- Hessling, A., & Schuele, C. M. (2020). Individualized Narrative Intervention for School-Age Children With Specific Language Impairment. *Language, Speech & Hearing Services in Schools*, 51(3), 687–705. [https://doi.org/10.1044/2019\\_LSHSS-19-00082](https://doi.org/10.1044/2019_LSHSS-19-00082)
- Hilvert, E., Hoover, J., Sterling, A., & Schroeder, S. (2020). Comparing Tense and Agreement Productivity in Boys With Fragile X Syndrome, Children With Developmental Language Disorder, and Children With Typical Development. *Journal of Speech, Language & Hearing Research*, 63(4), 1181–1194. [https://doi.org/10.1044/2019\\_JSLHR-19-00022](https://doi.org/10.1044/2019_JSLHR-19-00022)
- Hoover, J. R. (2018). Neighborhood Density and Syntactic Class Effects on Spoken Word Recognition: Specific Language Impairment and Typical Development. *Journal of Speech, Language & Hearing Research*, 61(5), 1226–1237. [https://doi.org/10.1044/2018\\_JSLHR-L-17-0099](https://doi.org/10.1044/2018_JSLHR-L-17-0099)
- Huang, T., & Finestack, L. (2020). Comparing Morphosyntactic Profiles of Children With Developmental Language Disorder or Language Disorder Associated With Autism Spectrum Disorder. *American Journal of Speech-Language Pathology*, 29(2), 714–731. [https://doi.org/10.1044/2019\\_AJSLP-19-00207](https://doi.org/10.1044/2019_AJSLP-19-00207)
- Hui-Chun Yang, & Gray, S. (2017). Executive Function in Preschoolers with Primary Language Impairment. *Journal of Speech, Language & Hearing Research*, 60(2), 379–392. [https://doi.org/10.1044/2016\\_JSLHR-L-15-0267](https://doi.org/10.1044/2016_JSLHR-L-15-0267)
- Iuzzini-Seigel, J., Hogan, T. P., & Green, J. R. (2017). Speech Inconsistency in Children With Childhood Apraxia of Speech, Language Impairment, and Speech Delay: Depends on the Stimuli. *Journal of Speech, Language & Hearing Research*, 60(5), 1194–1210. [https://doi.org/10.1044/2016\\_JSLHR-S-15-0184](https://doi.org/10.1044/2016_JSLHR-S-15-0184)
- Iuzzini-Seigel, J., Moorer, L., & Tamplin, P. (2022). An Investigation of Developmental Coordination Disorder Characteristics in Children With Childhood Apraxia of Speech. *Language, Speech & Hearing Services in Schools*, 53(4), 1006–1021. [https://doi.org/10.1044/2022\\_LSHSS-21-00163](https://doi.org/10.1044/2022_LSHSS-21-00163)
- Jackson, E., Leitão, S., Claessen, M., & Boyes, M. (2020). Working, Declarative, and Procedural Memory in Children With Developmental Language Disorder. *Journal of Speech, Language & Hearing Research*, 63(12), 4162–4178. [https://doi.org/10.1044/2020\\_JSLHR-20-00135](https://doi.org/10.1044/2020_JSLHR-20-00135)
- Jacobson, P. F. & Yan H. Yu. (2018). Changes in English Past Tense Use by Bilingual School-Age Children With and Without Developmental Language Disorder. *Journal of Speech, Language & Hearing Research*, 61(10), 2532–2546. [https://doi.org/10.1044/2018\\_JSLHR-L-17-0044](https://doi.org/10.1044/2018_JSLHR-L-17-0044)
- Jasso, J., McMillen, S., Anaya, J. B., Bedore, L. M., & Peña, E. D. (2020). The Utility of an English Semantics Measure for Identifying Developmental Language Disorder in Spanish-English Bilinguals. *American Journal of Speech-Language Pathology*, 29(2), 776–788. [https://doi.org/10.1044/2020\\_AJSLP-19-00202](https://doi.org/10.1044/2020_AJSLP-19-00202)

- Jeewon Yoo & Dongsun Yim. (2021). Relative Clause Sentence Processing in Korean-Speaking School-Aged Children With and Without Specific Language Impairment. *Journal of Speech, Language & Hearing Research*, 64(2), 510–530. [https://doi.org/10.1044/2020\\_JSLHR-19-00373](https://doi.org/10.1044/2020_JSLHR-19-00373)
- Ji Sook Park, Miller, C. A., Sanjeevan, T., van Hell, J. G., Weiss, D. J., & Mainela-Arnold, E. (2020). Bilingualism and Processing Speed in Typically Developing Children and Children With Developmental Language Disorder. *Journal of Speech, Language & Hearing Research*, 63(5), 1479–1493. [https://doi.org/10.1044/2020\\_JSLHR-19-00403](https://doi.org/10.1044/2020_JSLHR-19-00403)
- Jin, F., Schjølberg, S., Wang, M. V., Eadie, P., Bang Nes, R., Røysamb, E., & Tambs, K. (2020). Predicting Literacy Skills at 8 Years From Preschool Language Trajectories: A Population-Based Cohort Study. *Journal of Speech, Language & Hearing Research*, 63(8), 2752–2762. [https://doi.org/10.1044/2020\\_JSLHR-19-00286](https://doi.org/10.1044/2020_JSLHR-19-00286)
- Jokihaka, S., Laasonen, M., Lahti-Nuuttila, P., Smolander, S., Kunnari, S., Arkkila, E., Pesonen, A.-K., & Heinonen, K. (2022). Cross-Sectional and Longitudinal Associations Between Quality of Parent-Child Interaction and Language Ability in Preschool-Age Children With Developmental Language Disorder. *Journal of Speech, Language & Hearing Research*, 65(6), 2258–2271. [https://doi.org/10.1044/2022\\_JSLHR-21-00479](https://doi.org/10.1044/2022_JSLHR-21-00479)
- Justice, L. M., Hui Jiang, Logan, J. A., & Schmitt, M. B. (2017). Predictors of Language Gains Among School-Age Children With Language Impairment in the Public Schools. *Journal of Speech, Language & Hearing Research*, 60(6), 1590–1605. [https://doi.org/10.1044/2016\\_JSLHR-L-16-0026](https://doi.org/10.1044/2016_JSLHR-L-16-0026)
- Justice, L. M., Logan, J., Hui Jiang, & Schmitt, M. B. (2017). Algorithm-Driven Dosage Decisions (AD3): Optimizing Treatment for Children With Language Impairment. *American Journal of Speech-Language Pathology*, 26(1), 57–68. [https://doi.org/10.1044/2016\\_AJSLP-15-0058](https://doi.org/10.1044/2016_AJSLP-15-0058)
- Justice, L. M., Logan, J., & Kaderavek, J. N. (2017). Longitudinal Impacts of Print-Focused Read-Alouds for Children With Language Impairment. *American Journal of Speech-Language Pathology*, 26(2), 383–396. [https://doi.org/10.1044/2016\\_AJSLP-15-0200](https://doi.org/10.1044/2016_AJSLP-15-0200)
- Kaganovich, N. (2017). Sensitivity to Audiovisual Temporal Asynchrony in Children With a History of Specific Language Impairment and Their Peers With Typical Development: A Replication and Follow-Up Study. *Journal of Speech, Language & Hearing Research*, 60(8), 2259–2270. [https://doi.org/10.1044/2017\\_JSLHR-L-16-0327](https://doi.org/10.1044/2017_JSLHR-L-16-0327)
- Kapa, L. L. (2021). Improving Dimensional Change Card Sort Performance of Preschoolers With Developmental Language Disorder: Effects of Two Task Variations. *Journal of Speech, Language & Hearing Research*, 64(2), 628–634. [https://doi.org/10.1044/2020\\_JSLHR-20-00382](https://doi.org/10.1044/2020_JSLHR-20-00382)
- Kapa, L. L., & Erikson, J. A. (2020). The Relationship Between Word Learning and Executive Function in Preschoolers With and Without Developmental Language Disorder. *Journal of Speech, Language & Hearing Research*, 63(7), 2293–2307. [https://doi.org/10.1044/2020\\_JSLHR-19-00342](https://doi.org/10.1044/2020_JSLHR-19-00342)
- Kapa, L. L., & Mettler, H. M. (2021). Language and Executive Function in Preschoolers With Developmental Language Disorder: The Role of Self-Directed Speech.

- Perspectives of the ASHA Special Interest Groups*, 6(6), 1315–1326.  
[https://doi.org/10.1044/2021\\_PERSP-21-00010](https://doi.org/10.1044/2021_PERSP-21-00010)
- Kapa, L. L., Meyers-Denman, C., Plante, E., & Doubleday, K. (2020). Predictors of Treatment Response for Preschool Children With Developmental Language Disorder. *American Journal of Speech-Language Pathology*, 29(4), 2082–2096.  
[https://doi.org/10.1044/2020\\_AJSLP-19-00198](https://doi.org/10.1044/2020_AJSLP-19-00198)
- Kapa, L. L., Plante, E., & Doubleday, K. (2017). Applying an Integrative Framework of Executive Function to Preschoolers With Specific Language Impairment. *Journal of Speech, Language & Hearing Research*, 60(8), 2170–2184.  
[https://doi.org/10.1044/2017\\_JSLHR-L-16-0027](https://doi.org/10.1044/2017_JSLHR-L-16-0027)
- Kapantzoglou, M., Brown, J. E., Cycyk, L. M., & Fergadiotis, G. (2021). Code-Switching and Language Proficiency in Bilingual Children With and Without Developmental Language Disorder. *Journal of Speech, Language & Hearing Research*, 64(5), 1605–1620. [https://doi.org/10.1044/2020\\_JSLHR-20-00182](https://doi.org/10.1044/2020_JSLHR-20-00182)
- Kapantzoglou, M., Fergadiotis, G., & Buenavides, A. A. (2019). Psychometric Evaluation of Lexical Diversity Indices in Spanish Narrative Samples From Children With and Without Developmental Language Disorder. *Journal of Speech, Language & Hearing Research*, 62(1), 70–83. [https://doi.org/10.1044/2018\\_JSLHR-L-18-0110](https://doi.org/10.1044/2018_JSLHR-L-18-0110)
- Kapantzoglou, M., Fergadiotis, G., & Restrepo, M. A. (2017). Language Sample Analysis and Elicitation Technique Effects in Bilingual Children With and Without Language Impairment. *Journal of Speech, Language & Hearing Research*, 60(10), 2852–2864.  
[https://doi.org/10.1044/2017\\_JSLHR-L-16-0335](https://doi.org/10.1044/2017_JSLHR-L-16-0335)
- Kelley, L. E., & McCann, J. P. (2021). Language Intervention Isn't Just Spoken: Assessment and Treatment of a Deaf Signing Child With Specific Language Impairment. *Language, Speech & Hearing Services in Schools*, 52(4), 978–992.  
[https://doi.org/10.1044/2021\\_LSHSS-21-00038](https://doi.org/10.1044/2021_LSHSS-21-00038)
- Kreidler, K., Vuolo, J., & Goffman, L. (2023). Children With Developmental Language Disorder Show Deficits in the Production of Musical Rhythmic Groupings. *Journal of Speech, Language & Hearing Research*, 66(11), 4481–4496.  
[https://doi.org/10.1044/2023\\_JSLHR-23-00197](https://doi.org/10.1044/2023_JSLHR-23-00197)
- Krimm, H., Werfel, K. L., & Schuele, C. M. (2019). Toward Understanding the Lexical-Morphological Networks of Children With Specific Language Impairment: Analysis of Responses on a Morphological Production Task. *Journal of Speech, Language & Hearing Research*, 62(11), 4131–4136. [https://doi.org/10.1044/2019\\_JSLHR-L-18-0302](https://doi.org/10.1044/2019_JSLHR-L-18-0302)
- Kueser, J. B., & Leonard, L. B. (2020). The Effects of Frequency and Predictability on Repetition in Children With Developmental Language Disorder. *Journal of Speech, Language & Hearing Research*, 63(4), 1165–1180.  
[https://doi.org/10.1044/2019\\_JSLHR-19-00155](https://doi.org/10.1044/2019_JSLHR-19-00155)
- Kwok, E. Y. L., Joanisse, M. F., Archibald, L. M. D., & Oram Cardy, J. (2018). Immature Auditory Evoked Potentials in Children With Moderate—Severe Developmental Language Disorder. *Journal of Speech, Language & Hearing Research*, 61(7), 1718–1730. [https://doi.org/10.1044/2018\\_JSLHR-L-17-0420](https://doi.org/10.1044/2018_JSLHR-L-17-0420)

- Ladányi, E., & Lukács, Á. (2019). Word Retrieval Difficulties and Cognitive Control in Specific Language Impairment. *Journal of Speech, Language & Hearing Research*, 62(4), 918–931. [https://doi.org/10.1044/2018\\_JSLHR-L-17-0446](https://doi.org/10.1044/2018_JSLHR-L-17-0446)
- Lai-Sang Iao, Lai Yan Ng, Mei Yin Wong, A., & Oi Ting Lee. (2017). Nonadjacent Dependency Learning in Cantonese-Speaking Children With and Without a History of Specific Language Impairment. *Journal of Speech, Language & Hearing Research*, 60(3), 694–700. [https://doi.org/10.1044/2016\\_JSLHR-L-15-0232](https://doi.org/10.1044/2016_JSLHR-L-15-0232)
- Larson, C., Gangopadhyay, I., Kaushanskaya, M., & Weismer, S. E. (2019). The Relationship Between Language and Planning in Children With Language Impairment. *Journal of Speech, Language & Hearing Research*, 62(8), 2772–2784. [https://doi.org/10.1044/2019\\_JSLHR-L-18-0367](https://doi.org/10.1044/2019_JSLHR-L-18-0367)
- Larson, C., Kaplan, D., Kaushanskaya, M., & Weismer, S. E. (2020). Language and Inhibition: Predictive Relationships in Children With Language Impairment Relative to Typically Developing Peers. *Journal of Speech, Language & Hearing Research*, 63(4), 1115–1127. [https://doi.org/10.1044/2019\\_JSLHR-19-00210](https://doi.org/10.1044/2019_JSLHR-19-00210)
- Larson, C., & Weismer, S. E. (2022). Working Memory Performance in Children With Developmental Language Disorder: The Role of Domain. *Journal of Speech, Language & Hearing Research*, 65(5), 1906–1920. [https://doi.org/10.1044/2022\\_JSLHR-21-00420](https://doi.org/10.1044/2022_JSLHR-21-00420)
- Laurie, A., & Pesco, D. (2023). Curriculum-Based Dynamic Assessment of Narratives for Bilingual Filipino Children. *Language, Speech & Hearing Services in Schools*, 54(2), 489–503. [https://doi.org/10.1044/2022\\_LSHSS-22-00117](https://doi.org/10.1044/2022_LSHSS-22-00117)
- Lazewnik, R., Creaghead, N. A., Smith, A. B., Prendeville, J.-A., Raisor-Becker, L., & Silbert, N. (2019). Identifiers of Language Impairment for Spanish-English Dual Language Learners. *Language, Speech & Hearing Services in Schools*, 50(1), 126–137. [https://doi.org/10.1044/2018\\_LSHSS-17-0046](https://doi.org/10.1044/2018_LSHSS-17-0046)
- le Clercq, C. M. P., van der Schroeff, M. P., Rispens, J. E., Ruytjens, L., Goedegebure, A., van Ingen, G., & Franken, M.-C. (2017). Shortened Nonword Repetition Task (NWR-S): A Simple, Quick, and Less Expensive Outcome to Identify Children With Combined Specific Language and Reading Impairment. *Journal of Speech, Language & Hearing Research*, 60(8), 2241–2248. [https://doi.org/10.1044/2017\\_JSLHR-L-16-0060](https://doi.org/10.1044/2017_JSLHR-L-16-0060)
- Leonard, L. B., & Deevy, P. (2020). Retrieval Practice and Word Learning in Children With Specific Language Impairment and Their Typically Developing Peers. *Journal of Speech, Language & Hearing Research*, 63(10), 3252–3262. [https://doi.org/10.1044/2020\\_JSLHR-20-00006](https://doi.org/10.1044/2020_JSLHR-20-00006)
- Leonard, L. B., Deevy, P., Horvath, S., Christ, S. L., Karpicke, J., & Kueser, J. B. (2023). Can Retrieval Practice Facilitate Verb Learning in Children With Developmental Language Disorder and Their Peers With Typical Language Development? *Journal of Speech, Language & Hearing Research*, 66(4), 1309–1333. [https://doi.org/10.1044/2022\\_JSLHR-22-00509](https://doi.org/10.1044/2022_JSLHR-22-00509)
- Leonard, L. B., Deevy, P., Karpicke, J. D., Christ, S. L., & Kueser, J. B. (2020). After Initial Retrieval Practice, More Retrieval Produces Better Retention Than More Study in the Word Learning of Children With Developmental Language Disorder. *Journal of*

- Speech, Language & Hearing Research*, 63(8), 2763–2776.  
[https://doi.org/10.1044/2020\\_JSLHR-20-00105](https://doi.org/10.1044/2020_JSLHR-20-00105)
- Leonard, L. B., Deevy, P., Karpicke, J. D., Christ, S., Weber, C., Kueser, J. B., & Haebig, E. (2019). Adjective Learning in Young Typically Developing Children and Children With Developmental Language Disorder: A Retrieval-Based Approach. *Journal of Speech, Language & Hearing Research*, 62(12), 4433–4449.  
[https://doi.org/10.1044/2019\\_JSLHR-L-19-0221](https://doi.org/10.1044/2019_JSLHR-L-19-0221)
- Leonard, L. B., Haebig, E., Deevy, P., & Brown, B. (2017). Tracking the Growth of Tense and Agreement in Children With Specific Language Impairment: Differences Between Measures of Accuracy, Diversity, and Productivity. *Journal of Speech, Language & Hearing Research*, 60(12), 3590–3600.  
[https://doi.org/10.1044/2017\\_JSLHR-L-16-0427](https://doi.org/10.1044/2017_JSLHR-L-16-0427)
- Leonard, L. B., Karpicke, J., Deevy, P., Weber, C., Christ, S., Haebig, E., Souto, S., Kueser, J. B., & Krok, W. (2019). Retrieval-Based Word Learning in Young Typically Developing Children and Children With Developmental Language Disorder I: The Benefits of Repeated Retrieval. *Journal of Speech, Language & Hearing Research*, 62(4), 932–943. [https://doi.org/10.1044/2018\\_JSLHR-L-18-0070](https://doi.org/10.1044/2018_JSLHR-L-18-0070)
- Levlin, M., Wiklund-Hörnqvist, C., Sandgren, O., Karlsson, S., & Jonsson, B. (2022). Evaluating the Effect of Rich Vocabulary Instruction and Retrieval Practice on the Classroom Vocabulary Skills of Children With (Developmental) Language Disorder. *Language, Speech & Hearing Services in Schools*, 53, 542–560.  
[https://doi.org/10.1044/2021\\_LSHSS-21-00101](https://doi.org/10.1044/2021_LSHSS-21-00101)
- Lewis, B. A., Benchek, P., Tag, J., Miller, G., Freebairn, L., Taylor, H. G., Iyengar, S. K., & Stein, C. M. (2021). Psychosocial Comorbidities in Adolescents With Histories of Childhood Apraxia of Speech. *American Journal of Speech-Language Pathology*, 30, 2572–2588. [https://doi.org/10.1044/2021\\_AJSLP-21-00035](https://doi.org/10.1044/2021_AJSLP-21-00035)
- Ling-Yu Guo, Eisenberg, S., Schneider, P., & Spencer, L. (2019). Percent Grammatical Utterances Between 4 and 9 Years of Age for the Edmonton Narrative Norms Instrument: Reference Data and Psychometric Properties. *American Journal of Speech-Language Pathology*, 28(4), 1448–1462.  
[https://doi.org/10.1044/2019\\_AJSLP-18-0228](https://doi.org/10.1044/2019_AJSLP-18-0228)
- Ling-Yu Guo, Eisenberg, S., Schneider, P., & Spencer, L. (2020). Finite Verb Morphology Composite Between Age 4 and Age 9 for the Edmonton Narrative Norms Instrument: Reference Data and Psychometric Properties. *Language, Speech & Hearing Services in Schools*, 51(1), 128–143. [https://doi.org/10.1044/2019\\_LSHSS-19-0028](https://doi.org/10.1044/2019_LSHSS-19-0028)
- Ling-Yu Guo, Schneider, P., & Harrison, W. (2021). Clausal Density Between Ages 4 and 9 Years for the Edmonton Narrative Norms Instrument: Reference Data and Psychometric Properties. *Language, Speech & Hearing Services in Schools*, 52(1), 354–368. [https://doi.org/10.1044/2020\\_LSHSS-20-00043](https://doi.org/10.1044/2020_LSHSS-20-00043)
- Liu, X. L., de Villiers, J., Chunyan Ning, Rolfhus, E., Hutchings, T., Lee, W., Jiang, F., & Yi Wen Zhang. (2017). Research to Establish the Validity, Reliability, and Clinical Utility of a Comprehensive Language Assessment of Mandarin. *Journal of Speech, Language & Hearing Research*, 60(3), 592–606.  
[https://doi.org/10.1044/2016\\_JSLHR-L-15-0334](https://doi.org/10.1044/2016_JSLHR-L-15-0334)

- Lount, S. A., Purdy, S. C., & Hand, L. (2017). Hearing, Auditory Processing, and Language Skills of Male Youth Offenders and Remandees in Youth Justice Residences in New Zealand. *Journal of Speech, Language & Hearing Research*, 60(1), 121–135. [https://doi.org/10.1044/2016\\_JSLHR-L-15-0131](https://doi.org/10.1044/2016_JSLHR-L-15-0131)
- Lowe, H., Henry, L., & Joffe, V. L. (2019). The Effectiveness of Classroom Vocabulary Intervention for Adolescents With Language Disorder. *Journal of Speech, Language & Hearing Research*, 62(8), 2829–2846. [https://doi.org/10.1044/2019\\_JSLHR-L-18-0337](https://doi.org/10.1044/2019_JSLHR-L-18-0337)
- Lum, J. A. G., Youssef, G. J., & Clark, G. M. (2017). Using Pupillometry to Investigate Sentence Comprehension in Children With and Without Specific Language Impairment. *Journal of Speech, Language & Hearing Research*, 60(6), 1648–1660. [https://doi.org/10.1044/2017\\_JSLHR-L-16-0158](https://doi.org/10.1044/2017_JSLHR-L-16-0158)
- Lyons, R., & Roulstone, S. (2018). Well-Being and Resilience in Children With Speech and Language Disorders. *Journal of Speech, Language & Hearing Research*, 61(2), 324–344. [https://doi.org/10.1044/2017\\_JSLHR-L-16-0391](https://doi.org/10.1044/2017_JSLHR-L-16-0391)
- Malas, K., Trudeau, N., Giroux, M.-C., Gauthier, L., Poulin, S., & McFarland, D. H. (2017). Prior History of Feeding–Swallowing Difficulties in Children With Language Impairment. *American Journal of Speech-Language Pathology*, 26(1), 138–145. [https://doi.org/10.1044/2016\\_AJSLP-15-0171](https://doi.org/10.1044/2016_AJSLP-15-0171)
- Matte-Landry, A., Boivin, M., Tanguay-Garneau, L., Mimeau, C., Brendgen, M., Vitaro, F., Tremblay, R. E., & Dionne, G. (2020). Children With Persistent Versus Transient Early Language Delay: Language, Academic, and Psychosocial Outcomes in Elementary School. *Journal of Speech, Language & Hearing Research*, 63(11), 3760–3774. [https://doi.org/10.1044/2020\\_JSLHR-20-00230](https://doi.org/10.1044/2020_JSLHR-20-00230)
- Matuszkiewicz, M., & Gałkowski, T. (2021). Developmental Language Disorder and Uninhibited Primitive Reflexes in Young Children. *Journal of Speech, Language & Hearing Research*, 64(3), 935–948. [https://doi.org/10.1044/2020\\_JSLHR-19-00423](https://doi.org/10.1044/2020_JSLHR-19-00423)
- McDonald, J. L., & Oetting, J. B. (2019). Nonword Repetition Across Two Dialects of English: Effects of Specific Language Impairment and Nonmainstream Form Density. *Journal of Speech, Language & Hearing Research*, 62(5), 1381–1391. [https://doi.org/10.1044/2018\\_JSLHR-L-18-0253](https://doi.org/10.1044/2018_JSLHR-L-18-0253)
- McGregor, K. K., Eden, N., Arbisi-Kelm, T., & Oleson, J. (2020). The Fast-Mapping Abilities of Adults With Developmental Language Disorder. *Journal of Speech, Language & Hearing Research*, 63(9), 3117–3129. [https://doi.org/10.1044/2020\\_JSLHR-19-00418](https://doi.org/10.1044/2020_JSLHR-19-00418)
- McGregor, K. K., Gordon, K., Eden, N., Arbisi-Kelm, T., & Oleson, J. (2017). Encoding Deficits Impede Word Learning and Memory in Adults With Developmental Language Disorders. *Journal of Speech, Language & Hearing Research*, 60(10), 2891–2905. [https://doi.org/10.1044/2017\\_JSLHR-L-17-0031](https://doi.org/10.1044/2017_JSLHR-L-17-0031)
- McGregor, K. K., Ohlmann, N., Eden, N., Arbisi-Kelm, T., & Young, A. (2023). Abilities and Disabilities Among Children With Developmental Language Disorder. *Language, Speech & Hearing Services in Schools*, 54(3), 927–951. [https://doi.org/10.1044/2023\\_LSHSS-22-00070](https://doi.org/10.1044/2023_LSHSS-22-00070)



- McGregor, K. K., Van Horne, A. O., Curran, M., Cook, S. W., & Cole, R. (2021). The Challenge of Rich Vocabulary Instruction for Children With Developmental Language Disorder. *Language, Speech & Hearing Services in Schools*, 52, 467–484. [https://doi.org/10.1044/2020\\_LSHSS-20-00110](https://doi.org/10.1044/2020_LSHSS-20-00110)
- McMillen, S., Albudoor, N., Peña, E. D., & Bedore, L. M. (2023). Semantic Difficulty for Bilingual Children: Effects of Age, Language Exposure, and Language Ability. *American Journal of Speech-Language Pathology*, 32(2), 645–657. [https://doi.org/10.1044/2022\\_AJSLP-22-00018](https://doi.org/10.1044/2022_AJSLP-22-00018)
- McMillen, S., Griffin, Z. M., Peña, E. D., Bedore, L. M., & Oppenheime, G. M. (2020). "Did I Say Cherry?" Error Patterns on a Blocked Cyclic Naming Task for Bilingual Children With and Without Developmental Language Disorder. *Journal of Speech, Language & Hearing Research*, 63(4), 1148–1164. [https://doi.org/10.1044/2019\\_JSLHR-19-00041](https://doi.org/10.1044/2019_JSLHR-19-00041)
- Méndez, L. I., & Simon-Cereijido, G. (2019). A View of the Lexical-Grammatical Link in Young Latinos With Specific Language Impairment Using Language-Specific and Conceptual Measures. *Journal of Speech, Language & Hearing Research*, 62(6), 1775–1786. [https://doi.org/10.1044/2019\\_JSLHR-L-18-0315](https://doi.org/10.1044/2019_JSLHR-L-18-0315)
- Miller, G. J., & Lewis, B. A. (2022). Reading Skills in Children With Suspected Childhood Apraxia of Speech and Children With Reading Disorders: Same or Different? *Language, Speech & Hearing Services in Schools*, 53(4), 985–1005. [https://doi.org/10.1044/2022\\_LSHSS-21-00149](https://doi.org/10.1044/2022_LSHSS-21-00149)
- Montgomery, J. W., Evans, J. L., Fargo, J. D., Schwartz, S., & Gillam, R. B. (2018). Structural Relationship Between Cognitive Processing and Syntactic Sentence Comprehension in Children With and Without Developmental Language Disorder. *Journal of Speech, Language & Hearing Research*, 61(12), 2950–2976. [https://doi.org/10.1044/2018\\_JSLHR-L-17-0421](https://doi.org/10.1044/2018_JSLHR-L-17-0421)
- Montgomery, J. W., Gillam, R. B., Evans, J. L., Schwartz, S., & Fargo, J. D. (2019). A Comparison of the Storage-Only Deficit and Joint Mechanism Deficit Hypotheses of the Verbal Working Memory Storage Capacity Limitation of Children With Developmental Language Disorder. *Journal of Speech, Language & Hearing Research*, 62(10), 3808–3825. [https://doi.org/10.1044/2019\\_JSLHR-L-19-0071](https://doi.org/10.1044/2019_JSLHR-L-19-0071)
- Montgomery, J. W., Gillam, R. B., Evans, J. L., & Sergeev, A. V. (2017). "Whatdunit?" Sentence Comprehension Abilities of Children With SLI: Sensitivity to Word Order in Canonical and Noncanonical Structures. *Journal of Speech, Language & Hearing Research*, 60(9), 2603–2618. [https://doi.org/10.1044/2017\\_JSLHR-L-17-0025](https://doi.org/10.1044/2017_JSLHR-L-17-0025)
- Newbury, J., Justice, L. M., Jiang, H. H., & Schmitt, M. B. (2020). Cognitive, Noncognitive, and Home Environment Correlates of Reading Difficulties in Primary-Grade Students With Language Impairment. *Journal of Speech, Language & Hearing Research*, 63(6), 1933–1946. [https://doi.org/10.1044/2020\\_jslhr-19-00363](https://doi.org/10.1044/2020_jslhr-19-00363)
- Nicholas, K., Plante, E., Gómez, R., & Vance, R. (2021). The Role of Spontaneous Repetitions During Treatment of Morphosyntactic Forms for Children With Developmental Language Disorder. *Journal of Speech, Language & Hearing Research*, 64(10), 3995–4003. [https://doi.org/10.1044/2021\\_JSLHR-20-00367](https://doi.org/10.1044/2021_JSLHR-20-00367)

- Oetting, J. B., Berry, J. R., Gregory, K. D., Rivière, A. M., & McDonald, J. (2019). Specific Language Impairment in African American English and Southern White English: Measures of Tense and Agreement With Dialect-Informed Probes and Strategic Scoring. *Journal of Speech, Language & Hearing Research*, 62(9), 3443–3461. [https://doi.org/10.1044/2019\\_JSLHR-L-19-0089](https://doi.org/10.1044/2019_JSLHR-L-19-0089)
- Oetting, J. B., McDonald, J. L., & Vaughn, L. E. (2023). Grammaticality Judgments of Tense and Agreement by Children With and Without Developmental Language Disorder Across Dialects of English. *Journal of Speech, Language & Hearing Research*, 66(12), 4996–5010. [https://doi.org/10.1044/2023\\_JSLHR-23-00183](https://doi.org/10.1044/2023_JSLHR-23-00183)
- Oetting, J. B., Rivière, A. M., Berry, J. R., Gregory, K. D., Villa, T. M., & McDonald, J. (2021). Marking of Tense and Agreement in Language Samples by Children With and Without Specific Language Impairment in African American English and Southern White English: Evaluation of Scoring Approaches and Cut Scores Across Structures. *Journal of Speech, Language & Hearing Research*, 64(2), 491–509. [https://doi.org/10.1044/2020\\_JSLHR-20-00243](https://doi.org/10.1044/2020_JSLHR-20-00243)
- Øksendal, E., Brandlistuen, R. E., Wolke, D., Helland, S. S., Holte, A., & Wang, M. V. (2021). Associations Between Language Difficulties, Peer Victimization, and Bully Perpetration From 3 Through 8 Years of Age: Results From a Population-Based Study. *Journal of Speech, Language & Hearing Research*, 64(7), 2698–2714. [https://doi.org/10.1044/2021\\_JSLHR-20-00406](https://doi.org/10.1044/2021_JSLHR-20-00406)
- O'Neill, H., Murphy, C.-A., & Chiat, S. (2019). What Our Hands Tell Us: A Two-Year Follow-Up Investigating Outcomes in Subgroups of Children With Language Delay. *Journal of Speech, Language & Hearing Research*, 62(2), 356–366. [https://doi.org/10.1044/2018\\_JSLHR-L-17-0261](https://doi.org/10.1044/2018_JSLHR-L-17-0261)
- Orrego, P. M., McGregor, K. K., & Reyes, S. M. (2023). A First-Person Account of Developmental Language Disorder. *American Journal of Speech-Language Pathology*, 32(4), 1383–1396. [https://doi.org/10.1044/2023\\_AJSLP-22-00247](https://doi.org/10.1044/2023_AJSLP-22-00247)
- Park, J., Miller, C. A., Rosenbaum, D. A., Sanjeevan, T., van Hell, J. G., Weiss, D. J., & Mainela-Arnold, E. (2018). Bilingualism and Procedural Learning in Typically Developing Children and Children With Language Impairment. *Journal of Speech, Language & Hearing Research*, 61(3), 634–644. [https://doi.org/10.1044/2017\\_JSLHR-L-16-0409](https://doi.org/10.1044/2017_JSLHR-L-16-0409)
- Park, J., Miller, C. A., Sanjeevan, T., van Hell, J. G., Weiss, D. J., & Mainela-Arnold, E. (2019). Bilingualism and Attention in Typically Developing Children and Children With Developmental Language Disorder. *Journal of Speech, Language & Hearing Research*, 62(11), 4105–4118. [https://doi.org/10.1044/2019\\_JSLHR-L-18-0341](https://doi.org/10.1044/2019_JSLHR-L-18-0341)
- Pavelko, S. L., Lieberman, R. J., Schwartz, J., & Hahs-Vaughn, D. (2018). The Contributions of Phonological Awareness, Alphabet Knowledge, and Letter Writing to Name Writing in Children With Specific Language Impairment and Typically Developing Children. *American Journal of Speech-Language Pathology*, 27(1), 166–180. [https://doi.org/10.1044/2017\\_AJSLP-17-0084](https://doi.org/10.1044/2017_AJSLP-17-0084)
- Pavelko, S. L., & Owens Jr., R. E. (2019). Diagnostic Accuracy of the Sampling Utterances and Grammatical Analysis Revised (SUGAR) Measures for Identifying Children With

- Language Impairment. *Language, Speech & Hearing Services in Schools*, 50(2), 211–223. [https://doi.org/10.1044/2018\\_LSHSS-18-0050](https://doi.org/10.1044/2018_LSHSS-18-0050)
- Payesteh, B., & Pham, G. T. (2022). Is There a Cognate Effect in Bilingual Children With Developmental Language Disorder? *Language, Speech & Hearing Services in Schools*, 53(1), 213–221. [https://doi.org/10.1044/2021\\_LSHSS-21-00078](https://doi.org/10.1044/2021_LSHSS-21-00078)
- Peña, E. D., Bedore, L. M., & Granados Vargas, A. (2023). Exploring Assumptions of the Bilingual Delay in Children With and Without Developmental Language Disorder. *Journal of Speech, Language & Hearing Research*, 66(12), 4739–4755. [https://doi.org/10.1044/2023\\_JSLHR-23-00117](https://doi.org/10.1044/2023_JSLHR-23-00117)
- Petersen, D. B., Chanthongthip, H., Ukrainetz, T. A., Spencer, T. D., & Steeve, R. W. (2017). Dynamic Assessment of Narratives: Efficient, Accurate Identification of Language Impairment in Bilingual Students. *Journal of Speech, Language & Hearing Research*, 60(4), 983–998. [https://doi.org/10.1044/2016\\_JSLHR-L-15-0426](https://doi.org/10.1044/2016_JSLHR-L-15-0426)
- Petersen, D. B., Tonn, P., Spencer, T. D., & Foster, M. E. (2020). The Classification Accuracy of a Dynamic Assessment of Inferential Word Learning for Bilingual English/Spanish-Speaking School-Age Children. *Language, Speech & Hearing Services in Schools*, 51(1), 144–164. [https://doi.org/10.1044/2019\\_LSHSS-18-0129](https://doi.org/10.1044/2019_LSHSS-18-0129)
- Pfeiffer, D. L., & Pavelko, S. L. (2023). Evidence-Based Guidance for Alphabet Knowledge Across Service Delivery Models. *Perspectives of the ASHA Special Interest Groups*, 8(6), 1157–1167. [https://doi.org/10.1044/2023\\_PERSP-23-00053](https://doi.org/10.1044/2023_PERSP-23-00053)
- Pham, G. T., Pruitt-Lord, S., Snow, C. E., Yen Hoang Thi Nguyen, Phạm, B., Thuy Bich Thi Dao, Ngoc Bich Thi Tran, Linh Thuy Pham, Hien Thu Hoang, & Quynh Diem Dama. (2019). Identifying Developmental Language Disorder in Vietnamese Children. *Journal of Speech, Language & Hearing Research*, 62(5), 1452–1467. [https://doi.org/10.1044/2019\\_JSLHR-L-18-0305](https://doi.org/10.1044/2019_JSLHR-L-18-0305)
- Pijnacker, J., Davids, N., van Weerdenburg, M., Verhoeven, L., Knoors, H., & van Alphen, P. (2017). Semantic Processing of Sentences in Preschoolers With Specific Language Impairment: Evidence From the N400 Effect. *Journal of Speech, Language & Hearing Research*, 60(3), 627–639. [https://doi.org/10.1044/2016\\_JSLHR-L-15-0299](https://doi.org/10.1044/2016_JSLHR-L-15-0299)
- Plante, E., Mettler, H. M., Tucci, A., & Vance, R. (2019). Maximizing Treatment Efficiency in Developmental Language Disorder: Positive Effects in Half the Time. *American Journal of Speech-Language Pathology*, 28(3), 1233–1247. [https://doi.org/10.1044/2019\\_AJSLP-18-0285](https://doi.org/10.1044/2019_AJSLP-18-0285)
- Plante, E., Tucci, A., Nicholas, K., Arizmendi, G. D., & Vance, R. (2018). Effective Use of Auditory Bombardment as a Therapy Adjunct for Children With Developmental Language Disorders. *Language, Speech & Hearing Services in Schools*, 49(2), 320–333. [https://doi.org/10.1044/2017\\_LSHSS-17-0077](https://doi.org/10.1044/2017_LSHSS-17-0077)
- Plym, J., Lahti-Nuutila, P., Smolander, S., Arkkila, E., & Laasonen, M. (2021). Structure of Cognitive Functions in Monolingual Preschool Children With Typical Development and Children With Developmental Language Disorder. *Journal of Speech, Language & Hearing Research*, 64(8), 3140–3158. [https://doi.org/10.1044/2021\\_JSLHR-20-00546](https://doi.org/10.1044/2021_JSLHR-20-00546)

- Pomper, R., McGregor, K. K., Arbisi-Kelm, T., Eden, N., & Ohlmann, N. (2022). Direct Instruction Improves Word Learning for Children With Developmental Language Disorder. *Journal of Speech, Language & Hearing Research*, 65(11), 4228–4249. [https://doi.org/10.1044/2022\\_JSLHR-22-00300](https://doi.org/10.1044/2022_JSLHR-22-00300)
- Pratt, A. S., Grinstead, J. A., & McCauley, R. J. (2020). Emergent Literacy in Spanish-Speaking Children With Developmental Language Disorder: Preliminary Findings of Delays in Comprehension- and Code-Related Skills. *Journal of Speech, Language & Hearing Research*, 63(12), 4193–4207. [https://doi.org/10.1044/2020\\_JSLHR-19-00239](https://doi.org/10.1044/2020_JSLHR-19-00239)
- Puglisi, M. L., Blasi, H. F., & Snowling, M. J. (2020). Screening for the Identification of Oral Language Difficulties in Brazilian Preschoolers: A Validation Study. *Language, Speech & Hearing Services in Schools*, 51(3), 852–865. [https://doi.org/10.1044/2020\\_LSHSS-19-00083](https://doi.org/10.1044/2020_LSHSS-19-00083)
- Rakhlin, N. V., Nan Li, Aljughaiman, A., & Grigorenko, E. L. (2020). Narrative Language Markers of Arabic Language Development and Impairment. *Journal of Speech, Language & Hearing Research*, 63(10), 3472–3487. [https://doi.org/10.1044/2020\\_JSLHR-20-00082](https://doi.org/10.1044/2020_JSLHR-20-00082)
- Redmond, S. M. (2020). Clinical Intersections Among Idiopathic Language Disorder, Social (Pragmatic) Communication Disorder, and Attention-Deficit/Hyperactivity Disorder. *Journal of Speech, Language & Hearing Research*, 63(10), 3263–3276. [https://doi.org/10.1044/2020\\_JSLHR-20-00050](https://doi.org/10.1044/2020_JSLHR-20-00050)
- Redmond, S. M., & Ash, A. C. (2017). Associations Between the 2D:4D Proxy Biomarker for Prenatal Hormone Exposures and Symptoms of Developmental Language Disorder. *Journal of Speech, Language & Hearing Research*, 60(11), 3226–3236. [https://doi.org/10.1044/2017\\_JSLHR-L-17-0143](https://doi.org/10.1044/2017_JSLHR-L-17-0143)
- Rice, M. L., Earnest, K. K., & Hoffman, L. (2023). Longitudinal Grammaticality Judgments of Tense Marking in Complex Questions in Children With and Without Specific Language Impairment, Ages 5–18 Years. *Journal of Speech, Language & Hearing Research*, 66(10), 3882–3906. [https://doi.org/10.1044/2023\\_JSLHR-22-00507](https://doi.org/10.1044/2023_JSLHR-22-00507)
- Rice, M. L., Taylor, C. L., Zubrick, S. R., Hoffman, L., & Earnest, K. K. (2020). Heritability of Specific Language Impairment and Nonspecific Language Impairment at Ages 4 and 6 Years Across Phenotypes of Speech, Language, and Nonverbal Cognition. *Journal of Speech, Language & Hearing Research*, 63(3), 793–813. [https://doi.org/10.1044/2019\\_JSLHR-19-00012](https://doi.org/10.1044/2019_JSLHR-19-00012)
- Rivière, A. M., Oetting, J. B., & Roy, J. (2018). Effects of Specific Language Impairment on a Contrastive Dialect Structure: The Case of Infinitival TO Across Various Nonmainstream Dialects of English. *Journal of Speech, Language & Hearing Research*, 61(8), 1989–2001. [https://doi.org/10.1044/2018\\_JSLHR-L-17-0209](https://doi.org/10.1044/2018_JSLHR-L-17-0209)
- Roebuck, H., Sindberg, H., & Weismer, S. E. (2018). The Role of Language in Nonlinguistic Stimuli: Comparing Inhibition in Children With Language Impairment. *Journal of Speech, Language & Hearing Research*, 61(5), 1216–1225. [https://doi.org/10.1044/2018\\_JSLHR-L-17-0294](https://doi.org/10.1044/2018_JSLHR-L-17-0294)
- Roepke, E., Bower, K. E., Miller, C. A., & Brosseau-Lapr  , F. (2020). The Speech “Bamana”: Using the Syllable Repetition Task to Identify Underlying Phonological

- Deficits in Children With Speech and Language Impairments. *Journal of Speech, Language & Hearing Research*, 63(7), 2229–2244. [https://doi.org/10.1044/2020\\_JSLHR-20-00027](https://doi.org/10.1044/2020_JSLHR-20-00027)
- Roesch, A. D., & Chondrogianni, V. (2021). Comprehension of Welcher-Questions in German-Speaking Children With and Without Developmental Language Disorder. *Journal of Speech, Language & Hearing Research*, 64(5), 1683–1695. [https://doi.org/10.1044/2021\\_JSLHR-20-00121](https://doi.org/10.1044/2021_JSLHR-20-00121)
- Runnion, E. A., Pierce, M., & Restrepo, M. A. (2022). Measuring English Narrative Microstructure in Preschool Dual Language Learners. *Language, Speech & Hearing Services in Schools*, 53, 532–541. [https://doi.org/10.1044/2021\\_LSHSS-21-00107](https://doi.org/10.1044/2021_LSHSS-21-00107)
- Russell, K. M. H., Wilder, A., & Wambaugh, J. L. (2023). Pattern-Based Target Selection for Treatment of Irregular Past Tense: A Single-Case Experimental Design for Children With Developmental Language Disorder. *American Journal of Speech-Language Pathology*, 32(5), 2057–2074. [https://doi.org/10.1044/2023\\_AJSLP-22-00038](https://doi.org/10.1044/2023_AJSLP-22-00038)
- Saar, V., Levänen, S., & Komulainen, E. (2018). Cognitive Profiles of Finnish Preschool Children With Expressive and Receptive Language Impairment. *Journal of Speech, Language & Hearing Research*, 61(2), 386–397. [https://doi.org/10.1044/2017\\_JSLHR-L-16-0365](https://doi.org/10.1044/2017_JSLHR-L-16-0365)
- Saletta, M., Goffman, L., Ward, C., & Oleson, J. (2018). Influence of Language Load on Speech Motor Skill in Children With Specific Language Impairment. *Journal of Speech, Language & Hearing Research*, 61(3), 675–689. [https://doi.org/10.1044/2017\\_JSLHR-L-17-0066](https://doi.org/10.1044/2017_JSLHR-L-17-0066)
- Sanabria, A. A., Restrepo, M. A., Walker, E., & Glenberg, A. (2022). A Reading Comprehension Intervention for Dual Language Learners With Weak Language and Reading Skills. *Journal of Speech, Language & Hearing Research*, 65(2), 738–759. [https://doi.org/10.1044/2021\\_JSLHR-21-00266](https://doi.org/10.1044/2021_JSLHR-21-00266)
- Sanabria, A., Restrepo, M. A., Peter, B., Valentin, A., & Glenberg, A. (2023). Relationships Among Motor, First, and Second Language Skills Among Bilingual Children With Language Disorders. *Journal of Speech, Language & Hearing Research*, 66(9), 3536–3549. [https://doi.org/10.1044/2023\\_JSLHR-23-00043](https://doi.org/10.1044/2023_JSLHR-23-00043)
- Sanjeevan, T., & Mainela-Arnold, E. (2017). Procedural Motor Learning in Children With Specific Language Impairment. *Journal of Speech, Language & Hearing Research*, 60(11), 3259–3269. [https://doi.org/10.1044/2017\\_JSLHR-L-16-0457](https://doi.org/10.1044/2017_JSLHR-L-16-0457)
- Sanjeevan, T., Rosenbaum, D. A., & Mainela-Arnold, E. (2018). Planning Deficits in Children With Specific Language Impairment Are Reflected in Unnecessarily Awkward Grasps. *Journal of Speech, Language & Hearing Research*, 61(4), 887–896. [https://doi.org/10.1044/2017\\_JSLHR-L-17-0246](https://doi.org/10.1044/2017_JSLHR-L-17-0246)
- Scheffer, A., Keij, B., Hakvoort, B., Ottow, E., Gerrits, E., & Wijnen, F. (2022). Disentangling the Grammar of 3- to 6-Year-Old Dutch Children With a Developmental Language Disorder. *Journal of Speech, Language & Hearing Research*, 65(11), 4250–4267. [https://doi.org/10.1044/2022\\_JSLHR-21-00598](https://doi.org/10.1044/2022_JSLHR-21-00598)

- Schmitt, M. B. (2020). Children's Active Engagement in Public School Language Therapy Relates to Greater Gains. *American Journal of Speech-Language Pathology*, 29(3), 1505–1513. [https://doi.org/10.1044/2020\\_AJSLP-19-00157](https://doi.org/10.1044/2020_AJSLP-19-00157)
- Schmitt, M. B., Logan, J. A. R., Tambyraja, S. R., Farquharson, K., & Justice, L. M. (2017). Establishing Language Benchmarks for Children With Typically Developing Language and Children With Language Impairment. *Journal of Speech, Language & Hearing Research*, 60(2), 364–378. [https://doi.org/10.1044/2016\\_JSLHR-L-15-0273](https://doi.org/10.1044/2016_JSLHR-L-15-0273)
- Schmitt, M. B., Tambyraja, S., & Siddiqui, S. (2022). Peer Effects in Language Therapy for Preschoolers With Developmental Language Disorder: A Pilot Study. *American Journal of Speech-Language Pathology*, 31(4), 1854–1867. [https://doi.org/10.1044/2022\\_AJSLP-21-00313](https://doi.org/10.1044/2022_AJSLP-21-00313)
- Schmitt, M. B., Tambyraja, S., Thibodeaux, M., & Filipkowski, J. (2022). Feasibility of Assessing Expressive and Receptive Vocabulary via Telepractice for Early Elementary-Age Children With Language Impairment. *Language, Speech & Hearing Services in Schools*, 53, 445–453. [https://doi.org/10.1044/2021\\_LSHSS-21-00057](https://doi.org/10.1044/2021_LSHSS-21-00057)
- Schwob, S., & Skoruppa, K. (2022). Detecting Developmental Language Disorder in Monolingual and Bilingual Children: Comparison of Language-Specific and Crosslinguistic Nonword Repetition Tasks in French and Portuguese. *Journal of Speech, Language & Hearing Research*, 65(3), 1159–1165. [https://doi.org/10.1044/2021\\_JSLHR-21-00017](https://doi.org/10.1044/2021_JSLHR-21-00017)
- Selin, C., Rice, M. L., & Jackson, Y. (2022). Adversity Exposure, Syntax, and Specific Language Impairment: An Exploratory Study. *Journal of Speech, Language & Hearing Research*, 65(9), 3471–3490. [https://doi.org/10.1044/2022\\_JSLHR-21-00578](https://doi.org/10.1044/2022_JSLHR-21-00578)
- Shaalán, S. (2020). Nonword Repetition Skills in Gulf Arabic—Speaking Children With Developmental Language Disorder. *Journal of Speech, Language & Hearing Research*, 63(11), 3700–3713. [https://doi.org/10.1044/2020\\_JSLHR-20-00040](https://doi.org/10.1044/2020_JSLHR-20-00040)
- Shivabasappa, P., Peña, E. D., & Bedore, L. M. (2019). Semantic Category Convergence in Spanish-English Bilingual Children With and Without Developmental Language Disorder. *Journal of Speech, Language & Hearing Research*, 62(7), 2361–2371. [https://doi.org/10.1044/2019\\_JSLHR-L-17-0427](https://doi.org/10.1044/2019_JSLHR-L-17-0427)
- Smolak, E., McGregor, K. K., Arbisi-Kelm, T., & Eden, N. (2020). Sustained Attention in Developmental Language Disorder and Its Relation to Working Memory and Language. *Journal of Speech, Language & Hearing Research*, 63(12), 4096–4108. [https://doi.org/10.1044/2020\\_JSLHR-20-00265](https://doi.org/10.1044/2020_JSLHR-20-00265)
- Smolík, F., & Matiasovitsová, K. (2021). Sentence Imitation With Masked Morphemes in Czech: Memory, Morpheme Frequency, and Morphological Richness. *Journal of Speech, Language & Hearing Research*, 64(1), 105–120. [https://doi.org/10.1044/2020\\_JSLHR-20-00370](https://doi.org/10.1044/2020_JSLHR-20-00370)
- Springle, A. P., & Hester, P. P. (2019). A Comparison of Visual- and Movement-Based Grammar Interventions for School-Age Children With Language Impairment. *Perspectives of the ASHA Special Interest Groups*, 4(5), 1085–1096. [https://doi.org/10.1044/2019\\_PERS-SIG16-2019-0001](https://doi.org/10.1044/2019_PERS-SIG16-2019-0001)

- Stanford, E., Durrleman, S., & Delage, H. (2019). The Effect of Working Memory Training on a Clinical Marker of French-Speaking Children With Developmental Language Disorder. *American Journal of Speech-Language Pathology*, 28(4), 1388–1410. [https://doi.org/10.1044/2019\\_AJSLP-18-0238](https://doi.org/10.1044/2019_AJSLP-18-0238)
- Stegenwallner-Schütz, M., & Adani, F. (2021). Number Dissimilarity Effects in Object-Initial Sentence Comprehension by German-Speaking Children With Specific Language Impairment. *Journal of Speech, Language & Hearing Research*, 64(3), 870–888. [https://doi.org/10.1044/2020\\_JSLHR-19-00305](https://doi.org/10.1044/2020_JSLHR-19-00305)
- Storkel, H. L., Komesidou, R., Fleming, K. K., & Swinburne Romine, R. (2017). Interactive Book Reading to Accelerate Word Learning by Kindergarten Children With Specific Language Impairment: Identifying Adequate Progress and Successful Learning Patterns. *Language, Speech & Hearing Services in Schools*, 48(2), 108–124. [https://doi.org/10.1044/2017\\_LSHSS-16-0058](https://doi.org/10.1044/2017_LSHSS-16-0058)
- Storkel, H. L., Komesidou, R., Pezold, M. J., Pitt, A. R., Fleming, K. K., & Romine, R. S. (2019). The Impact of Dose and Dose Frequency on Word Learning by Kindergarten Children With Developmental Language Disorder During Interactive Book Reading. *Language, Speech & Hearing Services in Schools*, 50(4), 518–539. [https://doi.org/10.1044/2019\\_LSHSS-VOIA-18-0131](https://doi.org/10.1044/2019_LSHSS-VOIA-18-0131)
- Storkel, H. L., Voelmle, K., Fierro, V., Flake, K., Fleming, K. K., & Rominea, R. S. (2017). Interactive Book Reading to Accelerate Word Learning by Kindergarten Children With Specific Language Impairment: Identifying an Adequate Intensity and Variation in Treatment Response. *Language, Speech & Hearing Services in Schools*, 48(1), 16–30. [https://doi.org/10.1044/2016\\_LSHSS-16-0014](https://doi.org/10.1044/2016_LSHSS-16-0014)
- Taha, J., Stojanovik, V., & Pagnamenta, E. (2021a). Expressive Verb Morphology Deficits in Arabic-Speaking Children With Developmental Language Disorder. *Journal of Speech, Language & Hearing Research*, 64(2), 561–578. [https://doi.org/10.1044/2020\\_JSLHR-19-00292](https://doi.org/10.1044/2020_JSLHR-19-00292)
- Taha, J., Stojanovik, V., & Pagnamenta, E. (2021b). Nonword Repetition Performance of Arabic-Speaking Children With and Without Developmental Language Disorder: A Study on Diagnostic Accuracy. *Journal of Speech, Language & Hearing Research*, 64(7), 2750–2765. [https://doi.org/10.1044/2021\\_JSLHR-20-00556](https://doi.org/10.1044/2021_JSLHR-20-00556)
- Taha, J., Stojanovik, V., & Pagnamenta, E. (2021c). Sentence Repetition as a Clinical Marker of Developmental Language Disorder: Evidence From Arabic. *Journal of Speech, Language & Hearing Research*, 64(12), 4876–4899. [https://doi.org/10.1044/2021\\_JSLHR-21-00244](https://doi.org/10.1044/2021_JSLHR-21-00244)
- Tomas, E., Demuth, K., & Petocz, P. (2017). The Role of Frequency in Learning Morphophonological Alternations: Implications for Children With Specific Language Impairment. *Journal of Speech, Language & Hearing Research*, 60(5), 1316–1329. [https://doi.org/10.1044/2016\\_JSLHR-L-16-0138](https://doi.org/10.1044/2016_JSLHR-L-16-0138)
- Toseeb, U., Vincent, J., Oginni, O. A., Asbury, K., & Newbury, D. F. (2023). The Development of Mental Health Difficulties in Young People With and Without Developmental Language Disorder: A Gene–Environment Interplay Study Using Polygenic Scores. *Journal of Speech, Language & Hearing Research*, 66, 1639–1657. [https://doi.org/10.1044/2023\\_JSLHR-22-00664](https://doi.org/10.1044/2023_JSLHR-22-00664)

- Urquhart Gillis, J., Gul, A., Fox, A., Parikh, A., & Arbel, Y. (2022). Artificial Grammar Learning in Children With Developmental Language Disorder. *Journal of Speech, Language & Hearing Research*, 65(1), 292–302. [https://doi.org/10.1044/2021\\_JSLHR-21-00050](https://doi.org/10.1044/2021_JSLHR-21-00050)
- van Berkel-van Hoof, L., Hermans, D., Knoors, H., & Verhoeven, L. (2019). Effects of Signs on Word Learning by Children With Developmental Language Disorder. *Journal of Speech, Language & Hearing Research*, 62(6), 1798–1812. [https://doi.org/10.1044/2019\\_JSLHR-L-18-0275](https://doi.org/10.1044/2019_JSLHR-L-18-0275)
- van den Bedem, N. P., Dockrell, J. E., van Alphen, P. M., Kalicharan, S. V., & Rieffe, C. (2018). Victimization, Bullying, and Emotional Competence: Longitudinal Associations in (Pre)Adolescents With and Without Developmental Language Disorder. *Journal of Speech, Language & Hearing Research*, 61(8), 2028–2044. [https://doi.org/10.1044/2018\\_JSLHR-L-17-0429](https://doi.org/10.1044/2018_JSLHR-L-17-0429)
- Van Horne, A. J. O., Curran, M., Larson, C., & Fey, M. E. (2018). Effects of a Complexity-Based Approach on Generalization of Past Tense -ed and Related Morphemes. *Language, Speech & Hearing Services in Schools*, 49, 681–693. [https://doi.org/10.1044/2018\\_LSHSS-STLT1-17-0142](https://doi.org/10.1044/2018_LSHSS-STLT1-17-0142)
- Van Horne, A. J. O., Fey, M., & Curran, M. (2017). Do the Hard Things First: A Randomized Controlled Trial Testing the Effects of Exemplar Selection on Generalization Following Therapy for Grammatical Morphology. *Journal of Speech, Language & Hearing Research*, 60(9), 2569–2588. [https://doi.org/10.1044/2017\\_JSLHR-L-17-0001](https://doi.org/10.1044/2017_JSLHR-L-17-0001)
- Vang Christensen, R. (2019). Sentence Repetition: A Clinical Marker for Developmental Language Disorder in Danish. *Journal of Speech, Language & Hearing Research*, 62(12), 4450–4463. [https://doi.org/10.1044/2019\\_JSLHR-L-18-0327](https://doi.org/10.1044/2019_JSLHR-L-18-0327)
- Vaughn, L. E., Oetting, J. B., & McDonald, J. L. (2023). Grammaticality Judgments of Tense and Agreement by Child Speakers of African American English: Effects of Clinical Status, Surface Form, and Grammatical Structure. *Journal of Speech, Language & Hearing Research*, 66, 1755–1770. [https://doi.org/10.1044/2023\\_JSLHR-22-00431](https://doi.org/10.1044/2023_JSLHR-22-00431)
- Vogt, S. S., & Kauschke, C. (2017). With Some Help From Others' Hands: Iconic Gesture Helps Semantic Learning in Children With Specific Language Impairment. *Journal of Speech, Language & Hearing Research*, 60(11), 3213–3225. [https://doi.org/10.1044/2017\\_JSLHR-L-17-0004](https://doi.org/10.1044/2017_JSLHR-L-17-0004)
- Vugs, B., Hendriks, M., Cuperus, J., Knoors, H., & Verhoeven, L. (2017). Developmental Associations Between Working Memory and Language in Children With Specific Language Impairment: A Longitudinal Study. *Journal of Speech, Language & Hearing Research*, 60(11), 3284–3294. [https://doi.org/10.1044/2017\\_JSLHR-L-17-0042](https://doi.org/10.1044/2017_JSLHR-L-17-0042)
- Vuolo, J., & Goffman, L. (2018). Language Skill Mediates the Relationship Between Language Load and Articulatory Variability in Children With Language and Speech Sound Disorders. *Journal of Speech, Language & Hearing Research*, 61(12), 3010–3022. [https://doi.org/10.1044/2018\\_JSLHR-L-18-0055](https://doi.org/10.1044/2018_JSLHR-L-18-0055)



- Vuolo, J., & Goffman, L. (2020). Vowel Accuracy and Segmental Variability Differentiate Children With Developmental Language Disorder in Nonword Repetition. *Journal of Speech, Language & Hearing Research*, 63(12), 3945–3960. [https://doi.org/10.1044/2020\\_JSLHR-20-00166](https://doi.org/10.1044/2020_JSLHR-20-00166)
- Vuolo, J., Goffman, L., & Zelaznik, H. N. (2017). Deficits in Coordinative Bimanual Timing Precision in Children With Specific Language Impairment. *Journal of Speech, Language & Hearing Research*, 60(2), 393–405. [https://doi.org/10.1044/2016\\_JSLHR-L-15-0100](https://doi.org/10.1044/2016_JSLHR-L-15-0100)
- Wada, R., Gillam, S. L., & Gillam, R. B. (2020). The Use of Structural Priming and Focused Recasts to Facilitate the Production of Subject- and Object-Focused Relative Clauses by School-Age Children With and Without Developmental Language Disorder. *American Journal of Speech-Language Pathology*, 29(4), 1883–1895. [https://doi.org/10.1044/2020\\_AJSLP-19-00090](https://doi.org/10.1044/2020_AJSLP-19-00090)
- Walters Jr., C. E., Nitin, R., Margulis, K., Boorom, O., Gustavson, D. E., Bush, C. T., Davis, L. K., Below, J. E., Cox, N. J., Camarata, S. M., & Gordon, R. L. (2020). Automated Phenotyping Tool for Identifying Developmental Language Disorder Cases in Health Systems Data (APT-DLD): A New Research Algorithm for Deployment in Large-Scale Electronic Health Record Systems. *Journal of Speech, Language & Hearing Research*, 63(9), 3019–3035. [https://doi.org/10.1044/2020\\_JSLHR-19-00397](https://doi.org/10.1044/2020_JSLHR-19-00397)
- Werfel, K. L., Hendricks, A. E., & Schuele, C. M. (2017). The Potential of Past Tense Marking in Oral Reading as a Clinical Marker of Specific Language Impairment in School-Age Children. *Journal of Speech, Language & Hearing Research*, 60(12), 3561–3572. [https://doi.org/10.1044/2017\\_JSLHR-L-17-0115](https://doi.org/10.1044/2017_JSLHR-L-17-0115)
- Werfel, K. L., & Krimm, H. (2017). A Preliminary Comparison of Reading Subtypes in a Clinical Sample of Children With Specific Language Impairment. *Journal of Speech, Language & Hearing Research*, 60(9), 2680–2686. [https://doi.org/10.1044/2017\\_JSLHR-L-17-0059](https://doi.org/10.1044/2017_JSLHR-L-17-0059)
- Werfel, K. L., Schuele, C. M., & Reed, P. (2019). Linguistic Contributions to Word-Level Spelling Accuracy in Elementary School Children With and Without Specific Language Impairment. *American Journal of Speech-Language Pathology*, 28(2), 599–611. [https://doi.org/10.1044/2018\\_AJSLP-18-0064](https://doi.org/10.1044/2018_AJSLP-18-0064)
- Wilder, A., & Redmond, S. M. (2022). The Reliability of Short Conversational Language Sample Measures in Children With and Without Developmental Language Disorder. *Journal of Speech, Language & Hearing Research*, 65(5), 1939–1955. [https://doi.org/10.1044/2022\\_JSLHR-21-00628](https://doi.org/10.1044/2022_JSLHR-21-00628)
- Williams, G. J., Larkin, R. F., Rose, N. V., Whitaker, E., Roeser, J., & Wood, C. (2021). Orthographic Knowledge and Clue Word Facilitated Spelling in Children With Developmental Language Disorder. *Journal of Speech, Language & Hearing Research*, 64(10), 3909–3927. [https://doi.org/10.1044/2021\\_JSLHR-20-00710](https://doi.org/10.1044/2021_JSLHR-20-00710)
- Wittke, K., & Spaulding, T. J. (2018). Which Preschool Children With Specific Language Impairment Receive Language Intervention? *Language, Speech & Hearing Services in Schools*, 49(1), 59–71. [https://doi.org/10.1044/2017\\_LSHSS-17-0024](https://doi.org/10.1044/2017_LSHSS-17-0024)

- Wray, C., Saunders, N., McGuire, R., Cousins, G., & Norbury, C. F. (2017). Gesture Production in Language Impairment: It's Quality, Not Quantity, That Matters. *Journal of Speech, Language & Hearing Research*, 60(4), 969–982. [https://doi.org/10.1044/2016\\_JSLHR-L-16-0141](https://doi.org/10.1044/2016_JSLHR-L-16-0141)
- Ying Hao, Li Sheng, Yiwen Zhang, Fan Jiang, de Villiers, J., Lee, W., & Xueman Lucy Liu. (2018). A Narrative Evaluation of Mandarin-Speaking Children With Language Impairment. *Journal of Speech, Language & Hearing Research*, 61(2), 345–359. [https://doi.org/10.1044/2017\\_JSLHR-L-16-0367](https://doi.org/10.1044/2017_JSLHR-L-16-0367)
- Ying-Ying Cheng, Hsin-Chi Wu, Hsin-Yi Shih, Pei-Wen Yeh, Huei-Ling Yen, & Chia-Ying Lee. (2021). Deficits in Processing of Lexical Tones in Mandarin-Speaking Children With Developmental Language Disorder: Electrophysiological Evidence. *Journal of Speech, Language & Hearing Research*, 64(4), 1176–1188. [https://doi.org/10.1044/2021\\_JSLHR-19-00392](https://doi.org/10.1044/2021_JSLHR-19-00392)
- Zuk, J., Iuzzini-Seigel, J., Cabbage, K., Green, J. R., & Hogan, T. P. (2018). Poor Speech Perception Is Not a Core Deficit of Childhood Apraxia of Speech: Preliminary Findings. *Journal of Speech, Language & Hearing Research*, 61(3), 583–592. [https://doi.org/10.1044/2017\\_JSLHR-S-16-0106](https://doi.org/10.1044/2017_JSLHR-S-16-0106)
